1           Isw2 and Ino80 chromatin remodeling factors regulate chromatin,  
2           replication, and copy number at the yeast ribosomal DNA locus  
3  
4  
5  
6

7       Sam Cutler<sup>1,2</sup>, Laura J Lee<sup>1,2</sup>, Toshio Tsukiyama<sup>1\*</sup>  
8  
9

10  
11       <sup>1</sup>Basic Sciences Division, Fred Hutchinson Cancer Research Center, Seattle, WA, United States  
12       of America  
13

14       <sup>2</sup>Molecular and Cellular Biology Program, University of Washington, Seattle, WA, United States  
15       of America  
16

17       \* [ttsukiya@fredhutch.org](mailto:ttsukiya@fredhutch.org)  
18  
19  
20  
21  
22

23       **Short title:** Chromatin remodeling factors and the ribosomal DNA locus

## 24 **Abstract**

25

26 In the budding yeast *Saccharomyces cerevisiae*, ribosomal RNA genes are encoded in a highly  
27 repetitive tandem array referred to as the ribosomal DNA (rDNA) locus. The yeast rDNA is the  
28 site of a diverse set of DNA-dependent processes, including transcription of ribosomal RNAs by  
29 RNA Polymerases I and III, transcription of non-coding RNAs by RNA Polymerase II, DNA  
30 replication initiation, replication fork blocking, and recombination-mediated regulation of rDNA  
31 repeat copy number. All of this takes place in the context of chromatin, but relatively little is  
32 known about the roles played by ATP-dependent chromatin remodeling factors at the yeast  
33 rDNA. In this work, we report that the *lsw2* and *Ino80* chromatin remodeling factors are targeted  
34 to this highly repetitive locus. We characterize for the first time their function in modifying local  
35 chromatin structure, finding that loss of these factors affects the occupancy of nucleosomes in  
36 the 35S ribosomal RNA gene and the positioning of nucleosomes flanking the ribosomal origin  
37 of replication. In addition, we report that *lsw2* and *Ino80* promote efficient firing of the ribosomal  
38 origin of replication and facilitate the regulated increase of rDNA repeat copy number. This work  
39 significantly expands our understanding of the importance of ATP-dependent chromatin  
40 remodeling for rDNA biology.

41

42

## 43 **Author Summary**

44

45 To satisfy high cellular demand for ribosomes, genomes contain many copies of the genes  
46 encoding the RNA components of ribosomes. In the budding yeast *Saccharomyces cerevisiae*,  
47 these ribosomal RNA genes are located in the “ribosomal DNA locus”, a highly repetitive array  
48 that contains approximately 150 copies of the same unit, in contrast to the single copies that

49 suffice for most genes. This repetitive quality creates unique regulatory needs. Chromatin  
50 structure, the packaging and organization of DNA, is a critical determinant of DNA-dependent  
51 processes throughout the genome. ATP-dependent chromatin remodeling factors are important  
52 regulators of chromatin structure, and yet relatively little is known about how members of this  
53 class of protein affect DNA organization or behavior at the rDNA. In this work, we show that the  
54 lsw2 and Ino80 chromatin remodeling factors regulate two features of chromatin structure at the  
55 rDNA, the occupancy and the positioning of nucleosomes. In addition, we find that these factors  
56 regulate two critical processes that function uniquely at this locus: DNA replication originating  
57 from within the rDNA array, and the regulated increase of rDNA repeat copy number.

58

59

## 60 **Introduction**

61

62 In exponentially growing cells, the enormous cellular demand for ribosomes is reflected in the  
63 proportion of resources dedicated to their production. For example, the production of ribosomal  
64 RNAs (rRNAs) accounts for an estimated 60% of all transcriptional activity in cycling yeast cells  
65 [1]. Because single genomic copies of rRNA genes would not support such large volumes of  
66 transcriptional output, eukaryotic genomes have evolved to include highly repetitive clusters of  
67 rRNA genes, termed the ribosomal DNA (rDNA) locus. In a typical cell of the budding yeast  
68 *Saccharomyces cerevisiae*, the rDNA locus comprises approximately 150-200 tandem repeats  
69 (Fig 1A). Each repeat contains a 35S ribosomal RNA (rRNA) gene, transcribed by RNA  
70 Polymerase I (Pol I), and an inter-genic spacer (IGS), split into IGS1 and IGS2 regions by the  
71 5S rRNA gene, which is transcribed by RNA Polymerase III (Pol III). Due to its large size and  
72 repetitive nature, the rDNA locus has unique regulatory needs, and the IGS1 and IGS2 regions  
73 contain genetic elements that are critical to addressing these needs.

74

75 Without an origin of replication (autonomously replicating sequence, or ARS), replicating the  
76 rDNA array would require replication forks to traverse multiple megabases of DNA from either  
77 end of the array. To avoid this, IGS1 contains a ribosomal ARS (rARS). As a consequence, the  
78 approximately 150 ARSs in a typical rDNA array account for nearly one third of all genomic  
79 origins of replication. Of these rARSs, only around 20% will fire in any given round of cell  
80 division [2, 3]. Because replication factors are limiting during each S-phase [4], firing of too  
81 many rARSs would take vital replicative resources away from other parts of the genome, raising  
82 the risk of delayed or incomplete replication. If too few rARSs fire, replication of the rDNA array  
83 may be delayed or incomplete [5]. Thus, properly striking this balance by regulating origin  
84 efficiency at the rDNA has critical consequences for global genome stability.

85

86 Genome stability is also affected by the size of the rDNA array [6]. Because of this, a  
87 mechanism exists to change the size of the array by adding or removing copies of the rDNA  
88 repeat if needed. The IGS2 region contains two genetic elements that are critical for this  
89 process: a bi-directional RNA Pol II promoter, E-pro, and a replication fork block (RFB). The  
90 RFB pauses replication forks moving through the IGS toward the 3' end of the 35S gene, but  
91 allows forks coming from within the adjacent 35S gene, and thus moving in the same direction  
92 as 35S transcription, to pass through or merge with paused forks. This activity is thought to  
93 prevent head-on collisions between replication machinery and densely loaded Pol I machinery  
94 in the highly transcribed 35S [3, 7]. In addition, forks paused at the RFB are the sites of targeted  
95 DNA double-strand breaks (DSBs). The level of transcription from the adjacent E-pro promoter  
96 influences the mechanism by which these targeted DSBs are repaired, which in turn influences  
97 whether a repeat is added to or removed from the rDNA array, or whether the copy number  
98 remains unchanged [8].

99

100 All DNA-dependent processes occurring at the rDNA, including transcription by multiple RNA  
101 polymerases, origin firing, and changes in rDNA copy number, happen in the context of  
102 chromatin structure. The Sir2 and Rpd3 histone deacetylases (HDACs) have well-established  
103 roles in regulating rDNA chromatin structure, origin activity, and copy number maintenance [5,  
104 8-10]. In addition, rDNA biology is regulated by ATP-dependent chromatin remodeling factors,  
105 which use the energy of ATP hydrolysis to modify the position and histone composition of  
106 nucleosomes. In humans, the nucleolar remodeling complex (NoRC) positions nucleosomes  
107 and recruits histone methyltransferase and histone deacetylase activity to promote rDNA  
108 silencing [11, 12]. In yeast, the SWI/SNF [13], Isw1, Isw2, and Chd1 [14] complexes have been  
109 implicated in regulating transcription of rRNAs. Until now, no remodeling factors have been  
110 shown to modify chromatin structure at the yeast rDNA or to affect any DNA-dependent  
111 processes beyond rRNA transcription at this locus.

112  
113 In this work, we show that the Isw2 and Ino80 ATP-dependent chromatin remodeling factors  
114 regulate chromatin structure at the rDNA. The Isw2 complex is known to slide nucleosomes  
115 over gene promoters [15], an activity that generally represses transcription, both for coding  
116 genes [16, 17] and antisense transcripts [18]. The Ino80 complex slides and evicts nucleosomes  
117 and removes the histone variant, H2A.Z [19-22]. Ino80 is also involved in regulating the  
118 checkpoint response following DNA damage, DNA damage repair, and DNA replication [23-25].  
119 Isw2 and Ino80 function together to promote replication of late-replicating regions of the genome  
120 in the presence of replication stress and to attenuate the S-phase checkpoint response [26, 27].  
121 Here, we show that both Isw2 and Ino80 are targeted to the ribosomal DNA locus in distinct  
122 patterns, primarily characterized by striking enrichment of Isw2 around the rARS and of Ino80  
123 through the 35S gene. Further, we report for the first time that these remodeling factors affect  
124 local chromatin structure, as loss of the factors increases nucleosome occupancy in the 35S  
125 and alters the positioning of nucleosomes flanking the rARS. We find that loss of Isw2 and

126 Ino80 reduces the proportion of active rDNA repeats without affecting overall transcription of  
127 rRNAs, but that *lsw2* and Ino80 positively contribute both to the efficiency of the rARS and to  
128 the rate of rDNA repeat copy number change. In sum, this study significantly expands our  
129 understanding of how ATP-dependent chromatin remodeling factors affect both chromatin  
130 structure and essential biological processes at the ribosomal DNA locus.

131

132

## 133 **Results**

134

### 135 **The *lsw2* and Ino80 chromatin remodeling complexes are targeted to the** 136 **ribosomal DNA locus**

137

138 All of the DNA-dependent processes that take place at the rDNA locus occur in the context of  
139 chromatin. Although HDACs such as Rpd3 and Sir2 have well-characterized functions in  
140 regulating chromatin structure, transcription, and copy number maintenance at the *S. cerevisiae*  
141 rDNA [8-10, 28], comparatively little is known about the roles played by ATP-dependent  
142 chromatin remodeling factors at this vitally important genomic locus. To address this, we  
143 performed chromatin immuno-precipitation followed by deep sequencing (ChIP-seq) to map  
144 where the *lsw2* and Ino80 chromatin remodeling factors are targeted at the rDNA. We found  
145 that the namesake, catalytic subunit of *lsw2* and Nhp10, a subunit wholly unique to the Ino80  
146 complex [23], were both targeted to the rDNA (Fig 1B). The ChIP-seq signal for *lsw2* was  
147 slightly above the genome-average throughout the 35S gene body. The pattern of targeting in  
148 the IGS included small peaks flanking the 5S gene and the region containing E-pro and RFB,  
149 but the most prominent signal was a striking, bimodal peak on top of and to one side of the  
150 rARS. Nhp10 was also present throughout the 35S gene body and showed a small peak around

151 the 5S. Each protein's ChIP-seq pattern at the rDNA was consistent with peaks elsewhere in the  
152 genome with regard to both shape and magnitude: *Isw2* tended to have fairly defined peaks that  
153 rise well above the genome average, located in intergenic regions, and *Nhp10* peaks were  
154 generally less prominent relative to the genome average and more diffusely spread throughout  
155 a transcription unit (Fig 1C). Given these distinct targeting patterns, we hypothesized that these  
156 ATP-dependent chromatin remodeling factors might have previously unknown functions at this  
157 highly repetitive, unique genomic locus.

158

159

### 160 ***Isw2* and *Ino80* affect nucleosome occupancy over the 35S rRNA gene**

161

162 In light of the established functions of the *Isw2* and *Ino80* complexes, we first asked whether  
163 these chromatin remodeling factors affect nucleosome occupancy within the rDNA locus, as this  
164 feature of chromatin structure has well-established importance at the rDNA. Individual rDNA  
165 repeats canonically exist in one of two discrete states, being either highly occupied with  
166 nucleosomes and transcriptionally inactive, or heavily depleted of nucleosomes and highly  
167 transcriptionally active [29-31]. We assessed how nucleosome occupancy at the rDNA is  
168 affected by these two chromatin remodeling factors with ChIP-seq of histone H3 in wild-type,  
169 *isw2Δ*, *nhp10Δ*, and *isw2Δ nhp10Δ* strains. This analysis revealed that nucleosome occupancy  
170 throughout the 35S gene body is appreciably increased in the *isw2Δ nhp10Δ* double mutant  
171 compared to wild-type and single deletion strains (Fig 2A, left panel). Notably, this is the part of  
172 the rDNA in which the ChIP-seq signals of both chromatin remodeling factors most significantly  
173 overlap, suggesting the possibility that these factors may work together in this region.

174

175 Given that rDNA repeats canonically exist in one of two discrete states that are associated with  
176 nucleosome occupancy, we hypothesized that the increased nucleosome occupancy in *isw2Δ*

177 *nhp10* $\Delta$  cells reflects a reduced ratio of active to inactive rDNA repeats. To test this, we used  
178 psoralen cross-linking, a well-established method in which DNA is treated with the DNA-  
179 intercalating compound, psoralen [29, 32]. Occupancy of chromatin by nucleosomes blocks  
180 incorporation of psoralen. Therefore, actively transcribed, nucleosome-depleted rDNA repeats  
181 become more heavily cross-linked with psoralen than inactive, nucleosome-occupied repeats.  
182 After digestion with appropriate restriction enzymes, Southern blotting, and hybridization with a  
183 probe targeting a region of the 35S gene unit, two discrete bands representing active and  
184 inactive repeats can be resolved [29, 32]. By this method, we found that *isw2* $\Delta$  *nhp10* $\Delta$  cells  
185 have a reduced proportion of active repeats compared to wild-type, *isw2* $\Delta$ , or *nhp10* $\Delta$  cells (Fig  
186 2B), consistent with the observed increase in H3 occupancy in double mutant cells. Based on  
187 these results, we concluded that the *Isw2* and *Ino80* chromatin remodeling factors increase the  
188 ratio of active to inactive rDNA repeats.

189

190

### 191 **Transcription of 35S ribosomal RNA is not affected by loss of *Isw2* or *Nhp10***

192

193 Based on the reduced proportion of nucleosome-depleted rDNA repeats in the *isw2* $\Delta$  *nhp10* $\Delta$   
194 mutant, we hypothesized that these cells would also show reduced levels of 35S rRNA  
195 transcription. The 35S is transcribed as a single long transcript before being cleaved and folded  
196 in a series of processing steps to yield mature 18S, 5.8S, and 25S RNAs [33]. Because mature  
197 rRNAs are components of ribosomes and thus highly stable and abundant, nascent RNA needs  
198 to be measured to assess the transcription rate of rRNAs. The External Transcribed Spacer 1  
199 (ETS1) and Internal Transcribed Spacer 1 (ITS1) sections of the 35S gene are transcribed but  
200 removed at early stages of rRNA processing. Levels of these RNA sequences thus reflect levels  
201 of nascent rRNA and are commonly used to measure the rate of 35S transcription [34, 35].  
202 Adopting this approach, we performed reverse-transcription quantitative PCR (RT-qPCR)



203 targeting parts of the ETS1 and ITS1 regions of the 35S pre-rRNA (Fig 2A). As expected, we  
204 found significantly reduced levels of both ETS1 and ITS1 in an *rpa49* deletion mutant, a strain  
205 known to have a reduced rate of RNA Pol I transcription [35, 36]. To our surprise, we did not  
206 see evidence of a significant difference in rates of 35S transcription in *isw2Δ nhp10Δ* compared  
207 to wild-type (Fig 2C). To confirm this unexpected result by an independent method, we next  
208 performed ChIP-seq analysis of the Pol I subunit RPA190, and observed virtually identical  
209 profiles in *isw2Δ nhp10Δ* and wild-type strains, with regard to both shape and overall levels (Fig  
210 2D). Based on these results, we concluded that *isw2Δ nhp10Δ* cells exhibit no significant  
211 defects in the rate of 35S transcription despite the observed differences in nucleosome  
212 occupancy and the proportion of nucleosome-occupied rDNA repeats in these mutants.

213

214

### 215 **Isw2 and Ino80 affect nucleosome positioning in the rDNA inter-genic spacer**

216

217 In addition to nucleosome occupancy, nucleosome positioning is known to be affected by both  
218 of these chromatin remodeling factors [15, 20]. Therefore, we assessed nucleosome positioning  
219 at the rDNA by micrococcal nuclease (MNase) digestion followed by deep sequencing (MNase-  
220 seq). We interpret each size-selected, paired-end read as coming from a nucleosome-protected  
221 fragment of DNA, and so from each paired-end read, the nucleosomal dyad center was inferred  
222 and plotted, resulting in the profiles shown (Fig 3A). By this method, nucleosome positions  
223 appear strongly shifted at known *Isw2* targets in *isw2Δ* and *isw2Δ nhp10Δ* mutants (S1 Fig). In  
224 contrast, no gross differences in nucleosome positions are observed throughout the 35S gene  
225 body (S2A Fig) or in the rDNA inter-genic spacer region (Fig 3A). Within the highly repetitive  
226 rDNA, sequencing data must be interpreted carefully, however, as it represents an average of  
227 the signal at all ~150 rDNA repeats in all cells sampled, and nucleosomes in only a fraction of  
228 those repeats may change positions in any given cell.

229

230 To refine our analysis, we compared MNase-seq profiles for the tested strains using ribbon plots  
231 in which the primary line shows the average signal at each base pair across multiple biological  
232 replicates, and the ribbon represents the standard error of the mean for those replicates (Fig  
233 3B). This method revealed striking differences in nucleosome positioning at the rDNA for two  
234 pairs of nucleosomes. One pair is in between the 35S promoter and the rARS, with each  
235 nucleosome substantially overlapping one of the two sub-peaks of the highly prominent *Isw2*  
236 peak (Fig 3B, left panel, identified as nucleosomes 1 and 2). The other pair of affected  
237 nucleosomes is in the region between the rARS and the 5S gene, overlapping half of the short  
238 *Isw2* peak encompassing the 5S (Fig 3B, right panel, nucleosomes 3 and 4). Each of these four  
239 MNase-seq dyad peaks appears to have two sub-species of nucleosome positions. We interpret  
240 each of these distinct sub-species as representing one of two distinct positions occupied by that  
241 nucleosome in different individual rDNA repeats in the array. Each of the four genotypes tested  
242 has a characteristic pattern of the relative heights of these two sub-species, which we propose  
243 reflects different proportions of rDNA arrays containing nucleosomes at either position.

244

245 At nucleosome 1, *isw2Δ* and *isw2Δ nhp10Δ* cells virtually only have sub-species 1*b*, while both  
246 wild-type and *nhp10Δ* cells also have a significant signal for sub-species 1*a*. At nucleosome 2,  
247 wild-type cells predominantly have sub-species 2*a*, whereas *isw2Δ* cells have more prominent  
248 signals for 2*b*, and *nhp10Δ* and *isw2Δ nhp10Δ* cells have roughly similar ratios of each sub-  
249 species. Nucleosome 3 resembles nucleosome 1, in that for some strains – in this case, wild-  
250 type, *isw2Δ*, and *nhp10Δ* cells – there is essentially only one sub-species, 3*b*, whereas only  
251 *isw2Δ nhp10Δ* cells have a small but distinct sub-species 3*a*. For nucleosome 4, wild-type and  
252 *isw2Δ* cells are very similar, with 4*b* dominating and 4*a* and 4*c* of similar, lower prominence,  
253 while *nhp10Δ* cells have similar levels of 4*c* but proportionally reduced 4*a* and 4*b* peaks. Again,  
254 the double mutant is the most different among the tested strains, as 4*c* is barely detectable,

255 while *4a* is on par with *4b* in *isw2Δ nhp10Δ* cells. In sum, the overall trend among these mutants  
256 is that in *isw2Δ nhp10Δ* cells, any given rDNA repeat is more likely to have nucleosomes  
257 positioned such that they are encroaching on the rARS. In contrast, in both *nhp10Δ* and wild-  
258 type cells, these same nucleosomes are more likely to be positioned farther away from the  
259 rARS, and in *isw2Δ* cells these nucleosomes have profiles somewhere in between wild-type and  
260 the double mutant.

261  
262 Nucleosomes 3 and 4 are located in between the rARS and the 5S rRNA gene. Thus, the  
263 positioning shifts of these nucleosomes relative to the rARS also happen, in the opposite  
264 direction, relative to the 5S. In addition, there were slight strain specific differences at the  
265 nucleosome partially overlapping the 5S: sub-species *a* is higher than *b* in wild-type, *isw2Δ*, and  
266 *nhp10Δ* cells, but the sub-species are roughly equivalent in *isw2Δ nhp10Δ* cells (S2B Fig).  
267 These differences in nucleosome positioning suggested that *Isw2* and *Ino80* might alter  
268 nucleosomes to regulate 5S transcription. Because this gene is only 120 bp in length and  
269 undergoes only minor processing before incorporation into ribosomes, it is difficult to distinguish  
270 between mature and nascent 5S rRNA transcripts. Therefore, to assess 5S transcription, we  
271 performed RNA Pol III ChIP-seq. Similarly to RNA Pol I levels at the 35S, Pol III levels at the 5S  
272 did not differ between wild-type and *isw2Δ nhp10Δ* cells (S2C Fig). Thus, we conclude that *Isw2*  
273 and *Ino80* do not significantly affect transcription of ribosomal RNAs despite changes in  
274 chromatin structure around the transcription units.

275  
276 It has been shown that the strength of MNase digestion can affect nucleosome mapping results,  
277 especially for nucleosomes that are highly MNase sensitive [37]. Because the differences in  
278 MNase-seq signal at the rDNA locus were more subtle than what is typically observed at single-  
279 copy loci, we sought to ensure that these differences are not due to differential MNase  
280 sensitivity of these nucleosomes. To this end, we compared the MNase-seq profiles for these

281 nucleosomes in wild-type and *isw2Δ nhp10Δ* strains using three different concentrations of  
282 MNase (Fig 3C, S3 Fig). The overall shapes of the MNase-seq profiles varied depending on  
283 MNase concentrations used. However, at any specific degree of digestion, the relative heights  
284 of nucleosomal sub-species for wild-type versus *isw2Δ nhp10Δ* cells matched the patterns  
285 described above. These results confirmed that the observed shifts in nucleosome positions in  
286 mutants were not due to differential MNase sensitivity of these nucleosomes.

287

288

### 289 **Isw2 and Ino80 facilitate efficient firing of rDNA origin of replication**

290

291 The prominent Isw2 peak around the rARS coupled with the shrinkage of NDRs over the rARS  
292 in chromatin remodeling factor mutants led us to ask whether origin activity is affected by these  
293 factors. To address this question, we performed two-dimensional (2D) gel electrophoresis  
294 probing activity of the rARS (Fig 4A, [3]). The Y arc of the 2D gel is comprised of restriction  
295 fragments in the process of being passively replicated, and the bubble arc of restriction  
296 fragments in which an origin of replication has actively fired. Therefore, the ratio of bubble to Y  
297 arc signals from asynchronously growing cells reflects the ratio of actively to passively  
298 replicated restriction fragments, and thus of origin efficiency. By this method, the ratio of rARS  
299 bubble to Y arc signal, and thus rARS origin efficiency, was greatest in the wild-type and slightly  
300 reduced in *isw2Δ* cells. In contrast, origin efficiency was moderately reduced in *nhp10Δ* cells  
301 and even more reduced in *isw2Δ nhp10Δ* double mutants (Fig 4B). These results indicate that  
302 the Isw2 and Ino80 chromatin remodeling factors promote the efficient firing of the ribosomal  
303 origin of replication.

304

305

306 **lsw2 and Ino80 affect replication fork pausing at the rDNA Replication Fork Block**

307

308 One unique aspect of DNA replication at the rDNA locus is the presence of the replication fork  
309 block (RFB). When bound by the Fob1 protein, the RFB directionally blocks the passage of  
310 replication forks from the IGS into the 3' end of the 35S gene body, preventing head-on  
311 collisions between the replication machinery and the densely-loaded transcriptional machinery  
312 moving through the highly transcribed 35S genes [3, 7]. However, replication forks moving in the  
313 same direction as that transcriptional machinery can pass through the RFB, thus allowing for  
314 complete replication of the rDNA array. Replication fork blocking at the RFB can be detected by  
315 2D gels as a distinct spot on the left end of the Y arc (Fig 4A). A light exposure of the 2D gel  
316 revealed reduced replication fork pausing at the RFB in remodeling factor mutants (Fig 4C).  
317 Quantifying the degree of replication fork blocking relative to the amount of loaded DNA is  
318 difficult, however, because of the large difference in the signal intensities of the RFB and the 1N  
319 spot, which represents non-replicating restriction fragments and serves as a reference for  
320 normalization. To accurately measure the degree of replication fork blocking at the RFB, we  
321 analyzed occupancy of Pol2, a subunit of DNA Polymerase epsilon, by CHIP-seq in  
322 asynchronously growing cells, an established method for globally measuring replication fork  
323 pausing [38]. Pol2 levels, and thus pausing, at the RFB are comparable to wild-type in *lsw2Δ*  
324 cells, but are reduced in *nhp10Δ* and *lsw2Δ nhp10Δ* mutants (Fig 5A), similar to what we  
325 observe for rARS efficiency. In contrast, Pol2 signals at known pause sites such as *PDC1* are  
326 very similar across all tested strains (S4 Fig), suggesting that differences in pausing at the rDNA  
327 RFB are unique to that locus, and not a genome-wide phenomenon.

328

329 Because Fob1 binding at the RFB is required for pausing at this locus, we next asked whether  
330 *lsw2* and *Ino80* affect replication fork blocking at the RFB by altering the level of Fob1 binding.  
331 To this end, we performed CHIP of Fob1 followed by qPCR using primers flanking the RFB. This

332 experiment revealed that the *nhp10Δ* strain, which exhibits the lowest level of replication fork  
333 pausing, also shows the lowest levels of Fob1 occupancy (Fig 5B). However, *isw2Δ nhp10Δ*  
334 cells, which have similarly low levels of pausing, have considerably higher levels of Fob1, on par  
335 with *isw2Δ* cells and above that of the wild-type cells. Therefore, the level of Fob1 binding alone  
336 cannot explain the strain-specific differences we observe in replication fork pausing at the RFB.

337

338

### 339 **Isw2 and Ino80 affect the rate of rDNA copy number change**

340

341 Replication fork pausing at the RFB is an essential step in the mechanism by which rDNA copy  
342 number is regulated. With some frequency, a targeted DNA double-strand break (DSB) will  
343 occur at replication forks paused at the RFB. Depending on how this DSB is repaired, an rDNA  
344 repeat can be removed from or added to the rDNA array, or there can be no change in rDNA  
345 copy number. Thus, Fob1-dependent replication fork pausing is a critical feature of rDNA copy  
346 number change. Given the differential pausing at the RFB in our remodeling factor mutants, we  
347 wondered whether Isw2 and Ino80 affect rDNA copy number change. To answer this question,  
348 we employed a strain in which endogenous *FOB1* has been deleted and the rDNA array  
349 reduced to 20 repeats. In the absence of Fob1, there is no pausing at the RFB, stabilizing the  
350 rDNA copy number. These cells can survive with 20 copies of the rDNA, but introduction of  
351 Fob1 via a plasmid causes rapid increase in the number of rDNA repeats via homologous  
352 recombination until the rDNA array reaches a normal size of approximately 150 copies [8].  
353 Starting with a *fob1* strain with 20 copies of the rDNA, *ISW2*, *NHP10*, or both genes were  
354 deleted. The Fob1 gene was then reintroduced on a plasmid, and the cells were cultured  
355 continuously under selection for almost 200 generations, with samples taken at multiple time  
356 points. The copy number of rDNA repeats was monitored by CHEF gel electrophoresis followed  
357 by Southern blot analysis using a probe against the rDNA locus.

358

359 Although all four strains began to increase their rDNA copy number immediately following  
360 introduction of plasmid-borne Fob1, each of the strains behaved differently (Figs 6A, B). In wild-  
361 type and *isw2* $\Delta$  cells, and to a slightly lesser degree in *nhp10* $\Delta$  cells, there was a significant  
362 jump in copy number at around 35 generations after Fob1 re-introduction, the earliest time point  
363 we were able to sample. In contrast, the double mutant exhibited only a very small increase in  
364 copy number at 35 generations. After nearly 200 generations in the presence of Fob1, both the  
365 wild-type and *isw2* $\Delta$  strains had recovered essentially wild-type rDNA copy number of around  
366 150 copies, and *nhp10* $\Delta$  was close to this number. In contrast, *isw2* $\Delta$  *nhp10* $\Delta$  had barely  
367 reached 100 copies by this time point. Based on this data, we conclude that *Isw2* and *Ino80*  
368 facilitate the regulated increase of rDNA copy number in the rDNA array, and that their loss  
369 reduces the rate at which rDNA copy number can be increased in a population of cells.

370

371

## 372 Discussion

373

374 The ribosomal DNA locus is the evolutionarily conserved site of many different DNA-dependent  
375 processes, all of which must be carefully balanced. Sufficient rRNA must be transcribed to  
376 support ribosome biogenesis, but without interfering with faithful replication of the rDNA [1]. The  
377 rDNA array must be fully replicated, while still allowing for the replication of other parts of the  
378 genome [5]. The size of the rDNA array must be carefully maintained through recombination, yet  
379 the array must be protected from unintended recombination despite its highly repetitive nature.  
380 Despite many studies detailing these complex processes, relatively little is known about how  
381 ATP-dependent chromatin remodeling factors dynamically regulate chromatin structure at the *S.*  
382 *cerevisiae* rDNA locus to allow for these processes to occur. It has been shown that the

383 SWI/SNF complex localizes to the rDNA and that deletion of its Snf6 subunit reduces 35S rRNA  
384 transcription [13]. In addition, it was shown that *lsw2*, *lsw1*, and *Chd1* are present at the rDNA,  
385 and that their simultaneous deletion reduces 35S rRNA transcriptional termination [14].  
386 However, the nature of chromatin regulation by these remodeling factors at the rDNA locus  
387 remains unknown, as does their involvement in processes beyond transcription of rRNA. In this  
388 study, we show that in addition to *lsw2*, the Ino80 ATP-dependent chromatin remodeling factor  
389 is targeted to this highly repetitive genomic locus. We show for the first time that these factors  
390 modify local chromatin structure at the levels of nucleosome occupancy, the ratio of  
391 nucleosome-occupied to nucleosome-depleted rDNA repeats, and nucleosome positioning. In  
392 addition, we find that these chromatin remodeling factors affect two critical activities that take  
393 place at the rDNA: replication initiation from the ribosomal ARS, and rDNA array amplification.  
394  
395 Our data indicate that *lsw2* and Ino80 do not affect overall levels of 35S rRNA transcription, a  
396 result that initially surprised us. According to the prevailing model, nucleosome occupancy  
397 through the 35S gene body dictates 35S transcription, as rDNA repeats that are heavily  
398 occupied with nucleosomes are transcriptionally silent, while repeats that are depleted of  
399 nucleosomes are transcriptionally active. Thus, based on the increased nucleosome occupancy  
400 and reduced proportion of psoralen-accessible rDNA repeats observed in *lsw2Δ nhp10Δ* cells  
401 relative to other tested strains, we expected that 35S rRNA transcription would be  
402 correspondingly decreased in the double mutant. The lack of an effect on transcription may be  
403 explained by the robustness of 35S transcriptional regulation: when one element of this system  
404 is disrupted, another element is adjusted to maintain the desired level of transcription. For  
405 example, in a *S. cerevisiae* strain in which the rDNA array has been reduced from a normal size  
406 of ~150 copies down to ~40 copies, loading of RNA Pol I on any given active repeat is  
407 increased, such that there is no net decrease in 35S transcriptional output [30]. Similarly, in  
408 mammalian cells, inducing silencing of some rDNA repeats by depletion of UBF leads to a



409 compensatory increase in transcription per active repeat [39]. We therefore speculate that the  
410 robust homeostatic regulation of rRNA transcription overcomes changes in nucleosome  
411 occupancy in *isw2Δ nhp10Δ* cells, reacting to a reduced proportion of active repeats by  
412 increasing RNA Pol I transcription in each active unit. This would produce no net alteration in  
413 rRNA production compared to wild-type cells. We also note that our H3 ChIP-seq data reveals  
414 that the nucleosome-depleted region (NDR) in the 35S promoter is much deeper in *isw2Δ*  
415 *nhp10Δ* cells than in wild-type or single mutant cells (S5 Fig). According to a general paradigm  
416 of RNA Pol II transcription, promoter NDR depth correlates positively with transcription [40, 41].  
417 This deepened NDR in *isw2Δ nhp10Δ* cells may reflect significantly increased loading of Pol I  
418 transcriptional machinery in each active repeat, as needed to maintain proper levels of 35S  
419 transcription despite the reduced number of active repeats.

420  
421 A critical transcriptional regulator at the mammalian rDNA is the Nucleolar Remodeling Complex  
422 (NoRC), which contains SNF2h, the mammalian orthologue of yeast *Isw2*. Among other  
423 activities that influence rRNA transcription, this complex shifts the nucleosome at the promoter  
424 of the 45S rRNA gene, the mammalian orthologue of the yeast 35S, into a transcriptionally  
425 repressive position [12]. Notably, we see nearly identical nucleosome positioning profiles at the  
426 comparable nucleosome in *isw2Δ* and *isw2Δ nhp10Δ* cells compared to wild-type cells (S2D  
427 Fig). This finding, in conjunction with our observing no differences in rRNA transcription in these  
428 deletion strains, distinguishes the *Isw2*-mediated regulation of the yeast rDNA from the NoRC-  
429 mediated regulation of the mammalian rDNA.

430  
431 While we find that loss of *Isw2* and *Ino80* does not affect net rRNA transcription, we do find that  
432 their loss reduces the activity of the rARS. There are multiple reports that chromatin structure  
433 around replication origins significantly affects DNA replication. Blocking an ARS with a  
434 nucleosome reduces the efficiency of that ARS [42], and proper positioning of nucleosomes

435 adjacent to an ARS is important for replication initiation [43]. Compared to naked DNA,  
436 chromatinized DNA facilitates much greater origin selectivity at the stage of origin licensing,  
437 suggesting that chromatin structure regulates which origins fire during S-phase [44]. Consistent  
438 with these findings, ATP-dependent chromatin remodeling factors contribute to regulating  
439 replication initiation. For example, the SWI/SNF complex is targeted to a subset of origins in  
440 HeLa cells [45] and facilitates replication initiation at one out of four natural ARSs tested in a  
441 mini-chromosome maintenance assay in *S. cerevisiae* [46]. By applying an *in vitro* replication  
442 assay to nucleosomal templates remodeled by different chromatin remodeling factors, a recent  
443 study found that most factors permitted origin licensing, but that Isw2 and Chd1 prevented it  
444 [47]. As far as we know, however, there have been no reports of chromatin remodeling factors  
445 affecting both chromatin structure and replication initiation at a specific origin of replication at its  
446 natural genomic locus *in vivo*.

447

448 We report that loss of *ISW2* and *NHP10*, individually and together, reduced the efficiency of the  
449 rARS during logarithmic growth conditions in rich medium. We found that *isw2Δ nhp10Δ* cells  
450 have the most robust differences in nucleosome positioning compared to wild-type cells, with a  
451 clear trend of an enrichment for nucleosomes in positions that encroach on the rARS. These  
452 same cells have the most reduced efficiency at this ARS compared to wild-type. This effect is  
453 reminiscent of the behavior of Isw2 at Pol II-transcribed genes targeted by Isw2. At such genes,  
454 when *ISW2* is deleted, NDRs at the end of the gene targeted by Isw2 tend to widen, and nearby  
455 non-coding transcription increases, suggesting that this remodeling factor typically functions to  
456 narrow these NDRs and repress non-coding transcription [18]. We observe a similar but  
457 oppositely oriented trend at the rARS, as our data suggest that the NDR containing the ARS  
458 overall becomes narrower and origin efficiency goes down in *isw2Δ nhp10Δ* cells, suggesting a  
459 normal function of these factors in keeping this NDR wide and thus permissive to replication  
460 initiation. We also note that although we see intermediate effects on both nucleosome

461 positioning and efficiency of the rARS in *isw2Δ* and *nhp10Δ* single mutant cells, there does not  
462 appear to be a clear additive effect that accounts for what we observe in the double mutant.  
463 Although *isw2Δ* cells have more rARS-encroaching nucleosomes than *nhp10Δ* cells, efficiency  
464 of the rARS appears greater in *isw2Δ* cells than in *nhp10Δ* cells. Thus, it appears that  
465 nucleosome positioning around the rARS can only partially account for the effect these  
466 remodeling factors have on efficiency of the rARS. Reduced rARS efficiency in our mutants may  
467 also be partially explained by the altered ratio of transcriptionally active to inactive rDNA  
468 repeats. Evidence suggests that rARSs are more likely to fire when they are adjacent to actively  
469 transcribed rDNA repeats [48]. In our proposed model, the proportion of actively transcribed  
470 repeats is reduced in *isw2Δ nhp10Δ* cells, and thus a reduced proportion of rARSs in the array  
471 are adjacent to actively transcribed repeats. This may contribute to the reduced origin efficiency  
472 we observe in these mutants.

473  
474 In addition to regulating rARS activity, a cell must carefully calibrate the size of the rDNA array.  
475 This highly repetitive locus must be large enough to allow for the transcription of sufficient  
476 ribosomal RNA to satisfy a cell's demand for ribosomes; in a typical yeast cell, approximately 75  
477 copies of the rDNA are actively transcribed to satisfy this demand [1]. However, those 75 copies  
478 of the rDNA repeat must be insufficient under some circumstances, as a typical yeast rDNA  
479 array contains around 150 copies of the rDNA repeat. According to the prevailing model, these  
480 additional copies are necessary to maximize genome stability. Active ribosomal RNA genes are  
481 transcribed at extremely high levels, with densely loaded transcriptional machinery. This  
482 presents an obstacle to the repair of damage to the underlying DNA, and persistent, un-repaired  
483 damage to the rDNA array delays complete replication of the genome and progression through  
484 S-phase [6]. Thus, to maximize genome stability, the rDNA array must be large enough to  
485 support sufficient rRNA transcription without requiring all repeats to be actively transcribed. This  
486 requirement imposes a lower limit on the optimal size of the rDNA array. Similarly, the array

487 cannot exceed a certain size. If the rDNA grows too large, its complete replication would require  
488 an excessively large proportion of the finite pool of replisome components available during each  
489 S-phase, depriving other parts of the genome of those replication factors [5]. In addition,  
490 evidence suggests that having a smaller rDNA array improves growth during persistent  
491 replication stress, perhaps by making more of the limiting replication factors available to other  
492 parts of the genome [49]. Thus, the number of repeats in the rDNA locus must be actively  
493 managed by the cell to facilitate optimal transcriptional output and maximize genome stability.  
494 Most of our knowledge about the mechanism of rDNA copy number change comes from  
495 studying the cellular response to a significant perturbation in copy number. For example, if an  
496 rDNA array is artificially truncated, it will steadily increase until it reaches a normal size [50].  
497 Conversely, the rDNA array will shrink when the *RPA135* subunit of RNA Pol I is deleted [50,  
498 51], when the activity of the origin recognition complex is compromised [52], or when a number  
499 of other replication factors are lost [49]. Together, these studies demonstrate that maintenance  
500 of the size of the rDNA is a vital process that is actively regulated by the cell.

501  
502 In this study, we describe a nearly two-fold reduction in the rate of copy number increase in  
503 *isw2Δ nhp10Δ* cells relative to wild-type cells, and moderate reductions in the rate of increase in  
504 *isw2Δ* and *nhp10Δ* cells. This is the first demonstration of any ATP-dependent chromatin  
505 remodeling factors contributing to the regulation of rDNA copy number change. We show that  
506 these remodeling factors affect Fob1 binding and replication fork pausing at the RFB, two critical  
507 steps in the process of copy number change, but the effects on these activities do not clearly  
508 correlate with the effects on the rate of copy number change we observe in the same mutants.  
509 Therefore, we do not believe the remodeling factors influence copy number change exclusively  
510 through replication fork pausing or Fob1 binding. Another critical step in this process is the  
511 repair of the targeted DNA double strand break (DSB) that takes place at RFB-paused  
512 replication forks. In light of a well-documented role for Ino80 in DSB repair [21, 53, 54], it is

513 possible that the striking defect in copy number increase we observe may result in part from  
514 mis-regulation of the recombination-based repair of these DSBs. In the absence of *NHP10*,  
515 there may be some mild defect in homologous recombination (HR) that may be partially  
516 compensated for by otherwise normal chromatin structure created by *Isw2*. However, in the  
517 double mutant, HR repair defects may become too significant to facilitate the desired  
518 recombination rate at rDNA.

519  
520 In addition to this possible direct involvement of the remodeling factors in copy number  
521 increase, the effect we observe may be indirect. Our data suggest that in the absence of *Isw2*  
522 and *Ino80*, the ratio of active to inactive rDNA repeats is reduced. In light of work showing that  
523 rARSs are more likely to fire when they are adjacent to actively transcribed rDNA repeats [48],  
524 we proposed above that this reduced proportion of active repeats could explain the reduced  
525 efficiency of the rARS in *isw2Δ nhp10Δ* cells. It has also been shown that copy number change  
526 events require firing of the rARS adjacent to the RFB at which a replication fork is paused, a  
527 DSB is induced, and then repaired. This same study found that the efficiency of the ARS in the  
528 IGS correlates with the rate of copy number increase [55]. Accordingly, it is possible that the  
529 reduced ratio of active to inactive repeats in the double mutant causes a change in rARS  
530 efficiency, which in turn reduces the frequency of copy number change events, thus accounting  
531 for the reduced rate of copy number increase in the double mutant cells. In sum, this work  
532 establishes a novel role for ATP-dependent chromatin remodeling factors in strongly influencing  
533 rDNA biology, including the process of rDNA copy number change.

534

535

## 536 **Materials and Methods**

537

538 **Yeast strains and media**

539 Strains used are listed in S1 Table. Strains generated using standard gene replacement  
540 protocols. Unless otherwise indicated, yeast cells were grown in YEPD medium (2% Bacto  
541 Peptone, 1% yeast extract, 2% glucose). All strains *MATa* W303-1a.

542

543 **Chromatin immunoprecipitation and micrococcal nuclease digestion followed by deep**  
544 **sequencing**

545 Chromatin immunoprecipitation (ChIP) and micrococcal nuclease (MNase) digestion were  
546 performed as described previously [58]. For H3-ChIP experiments, anti-H3 C-term antibody  
547 (Abcam catalog # ab1791) was used; for all other ChIPs, the targeted protein was epitope-  
548 tagged with FLAG, and immuno-precipitated using anti-FLAG monoclonal antibody (Sigma  
549 catalog # F3165). All *Isw2* ChIP-seq performed on a FLAG-tagged, catalytically inactive allele of  
550 *ISW2* as previously described [59]. All libraries were constructed using the Nugen Ovation  
551 Ultralow System V2 (catalog # 0344-32) and then subjected to single-end (ChIP-seq) or paired-  
552 end (MNase-seq) sequencing, with 50 bp read length, on Illumina Hi-Seq 2500. Ribbon plots,  
553 bar graphs, and line graphs were generated with the ggplot2 R package (<http://ggplot2.org/>). For  
554 all depictions of deep-sequencing data at the rDNA, a single copy of the rDNA locus is shown.  
555 Our reference genome contains two copies of the rDNA, and any read mapping to the rDNA is  
556 randomly assigned to one of these 2 copies. Thus, sequencing data reflects the average signal  
557 across all rDNA repeats in all cells sampled.

558

559 **Reverse Transcription- and ChIP-quantitative PCR**

560 RNA was isolated using hot acid phenol, then cleaned up with the Qiagen RNEasy Cleanup Kit  
561 (catalog # 74204) plus on-column treatment with DNase I (Qiagen catalog # 79254). cDNA was  
562 generated from the RNA using Superscript III Reverse Transcriptase (ThermoFisher catalog #  
563 18080093). Quantitative PCR was performed on both cDNA and ChIP DNA using 2x Power

564 SYBR Master Mix (Fisher Scientific catalog # 4367659) run on the ABI QuantStudio5 Real Time  
565 PCR System machine.

566

### 567 **Psoralen Crosslinking**

568 Assay was performed as previously described [10, 28, 32]. Cells were grown to mid-log phase  
569 ( $OD_{660} = 0.5-0.7$ ), approximately  $3 \times 10^8$  cells were collected, washed twice with ice cold water,  
570 and then re-suspended in 1.4 ml cold TE buffer. Cells were transferred to 6 well plates, and 70  
571  $\mu$ l of psoralen (200  $\mu$ g/ml in 100% ethanol) was added to the cells. On ice, the plates were  
572 irradiated with 365 nm UV for five minutes. Psoralen addition followed by UV irradiation was  
573 repeated four additional times, for a total of five rounds. Cells were collected, washed in water,  
574 spheroplasted with zymoYlase 100T, and washed in spheroplast buffer. The pellet was lysed by  
575 re-suspension in TE buffer with 0.5% SDS and then treated with Proteinase K overnight at  
576  $50^\circ\text{C}$ . DNA was extracted with Phenol:Chloroform:IAA, ethanol precipitated, and then digested  
577 for at least 3 hours with EcoRI-HF. Samples were treated with RNase A at  $37^\circ\text{C}$  for 30 minutes,  
578 ethanol precipitated, quantified, and then run in 1.3% LE agarose gels in 0.5X TBE for 24 hours  
579 at 60V. Gels were irradiated for two minutes per side with a Stratagene Stratalinker, transferred  
580 to a GeneScreen Plus membrane in 10x SSC, and then hybridized with a probe contained  
581 within a EcoRI restriction fragment in the rDNA ETS1. Membranes were visualized using a  
582 Typhoon Phosphor Imager, and images were visualized using ImageJ software.

583

### 584 **2D gel electrophoresis**

585 DNA sample preparation based on the Brewer/Raghuraman lab protocol ([http://fangman-  
586 brewer.genetics.washington.edu/plug.html](http://fangman-brewer.genetics.washington.edu/plug.html)). Cells were grown to mid-log phase ( $OD_{660} = 0.5-  
587 0.7$ ), sodium azide added to 0.1% final concentration, and then cultures were washed in water.  
588 Cell pellets were re-suspended in 50 mM EDTA, mixed with an equal volume of 1.0% Low-Melt  
589 Agarose (BioRad catalog # 161-3111), and pipetted into plug molds. Cells in plugs were

590 spheroplasted with 0.5 mg/ml Zymolyase 20-T, thoroughly washed, and stored in TE at 4°C.  
591 Plugs were digested with NheI for 5 hours at 37°C, then run in 0.4% agarose gels in TBE at 1  
592 V/cm for 22 hours at room temperature. Gels were stained with ethidium bromide (EtBr),  
593 visualized with UV, and the desired size range for each sample was identified in the gel and  
594 physically cut out. This piece of gel was then rotated 90° and placed in a new gel tray, and  
595 warm 1.1% agarose in TBE was poured around it. This gel was then run at 5 V/cm for 6 hours at  
596 4°C. After running, the gel was visualized, transferred onto a GeneScreen Plus membrane  
597 (Perkin Elmer, catalog # NEF986001PK), and hybridized with a probe encompassing the RFB.

598

#### 599 **rDNA copy number change assay**

600 Strains were made from YSI102 [6], in which the endogenous *FOB1* gene had been deleted,  
601 and the number of rDNA repeats reduced to 20 copies. From the 20-rDNA-copy *fob1* parent,  
602 *isw2Δ*, *nhp10Δ*, and *isw2Δ nhp10Δ* strains were generated. Separately, the *FOB1* gene was  
603 cloned into the pRS426 plasmid using Gibson cloning. Either this *FOB1*-pRS426 plasmid or a  
604 pRS426 plasmid with no *FOB1* gene was then transformed into each 20-copy strain and plated  
605 on yeast complete (YC) –URA medium with 2% glucose. Individual transformants were re-  
606 streaked on selective medium, presence of the desired plasmid was confirmed by PCR, and  
607 then transformants were inoculated into liquid YC –URA + 2% glucose. Cultures were allowed  
608 to reach saturation, and then aliquots were collected, washed in cold 50 mM EDTA, and cell  
609 pellets were frozen in liquid nitrogen and stored at -80°C. From the remaining saturated  
610 cultures, all strains were diluted by the same factor, then allowed to grow back to saturation, at  
611 which point the next time point would be collected, up to ~200 generations. Generations were  
612 calculated from the base 2 log of the dilution factor applied at each passage (e.g. a saturated  
613 culture diluted by a factor of 1,024 into the same volume of medium would require 10  
614 generations to return to saturation).



615

## 616 **Clamped Homogenous Electric Field (CHEF) gel electrophoresis and Southern blotting**

617 Samples for CHEF gels were prepared in agarose based on a previously described method  
618 [60]. Frozen cell pellets were thawed in room-temperature water, re-suspended in 100 mM  
619 EDTA, then mixed with 0.8% Low-Melt Agarose and 25 mg/ml zymolyase 20T. This mixture was  
620 pipetted into plug molds, allowed to solidify at 4°C, then washed with a series of buffers  
621 (Solution V: 500 mM EDTA pH 7.5, 10 mM Tris pH 7.5; Solution VI: 5% sarcosyl, 5 mg/ml  
622 proteinase K, 500 mM EDTA pH 7.5; Solution VII: 2 mM Tris pH 7.5, 1 mM EDTA, pH 8.0).  
623 Before being run, plugs were incubated for approximately 30 minutes in TBE running buffer at  
624 4°C before being placed on gel comb teeth, positioned in gel mold, and then warm 0.8% 0.5x  
625 TBE was poured. CHEF gel was run on a CHEF-DR II with a program adapted from Ide *et al*  
626 MCB 2007: Block 1 = 2.0 V/cm, pulse time of 1,200 seconds to 1,400 seconds, total run time  
627 72 hours; Block 2 = 6.0 V/cm, pulse time of 25 seconds to 146 seconds, total run time 7.5  
628 hours. After electrophoresis, gels were incubated with 0.5 ug/ml EtBr in running buffer for 30-45  
629 minutes, UV-irradiated with a Stratagene Stratalinker to nick DNA, transferred onto HyBond N+  
630 positively charged membrane (GE, catalog # RPN303B), and hybridized with a probe targeting  
631 the RFB.

632

633

## 634 **Acknowledgments**

635

636 We are grateful to members of the Brewer/Raghuraman lab, especially Bonny Brewer, MK  
637 Raghuraman, Joe Sanchez, and Liz Kwan, for help with experimental design and  
638 troubleshooting, as well as conceptual discussion and feedback, and members of the Smith lab,  
639 especially Randy Hyppa, for help with CHEF gels. We thank Takehiko Kobayashi for strains

640 used in this study. Finally, we thank members of the Tsukiyama lab for helpful discussion and  
641 commentary on this manuscript.

642

643

## 644 **References**

645

646 1. Warner JR. The economics of ribosome biosynthesis in yeast. *Trends Biochem Sci.*  
647 1999;24(11):437-40. Epub 1999/11/05. PubMed PMID: 10542411.

648 2. Walmsley RM, Johnston LH, Williamson DH, Oliver SG. Replicon size of yeast ribosomal  
649 DNA. *Mol Gen Genet.* 1984;195(1-2):260-6. Epub 1984/01/01. PubMed PMID: 6387390.

650 3. Brewer BJ, Fangman WL. A replication fork barrier at the 3' end of yeast ribosomal RNA  
651 genes. *Cell.* 1988;55(4):637-43. Epub 1988/11/18. PubMed PMID: 3052854.

652 4. Mantiero D, Mackenzie A, Donaldson A, Zegerman P. Limiting replication initiation  
653 factors execute the temporal programme of origin firing in budding yeast. *Embo j.*  
654 2011;30(23):4805-14. Epub 2011/11/15. doi: 10.1038/emboj.2011.404. PubMed PMID:  
655 22081107; PubMed Central PMCID: PMC3243606.

656 5. Yoshida K, Bacal J, Desmarais D, Padioleau I, Tsaponina O, Chabes A, et al. The  
657 histone deacetylases sir2 and rpd3 act on ribosomal DNA to control the replication program in  
658 budding yeast. *Mol Cell.* 2014;54(4):691-7. Epub 2014/05/27. doi:  
659 10.1016/j.molcel.2014.04.032. PubMed PMID: 24856221.

660 6. Ide S, Miyazaki T, Maki H, Kobayashi T. Abundance of ribosomal RNA gene copies  
661 maintains genome integrity. *Science.* 2010;327(5966):693-6. Epub 2010/02/06. doi:  
662 10.1126/science.1179044. PubMed PMID: 20133573.

- 663 7. Kobayashi T. The replication fork barrier site forms a unique structure with Fob1p and  
664 inhibits the replication fork. *Mol Cell Biol.* 2003;23(24):9178-88. Epub 2003/12/04. PubMed  
665 PMID: 14645529; PubMed Central PMCID: PMCPMC309713.
- 666 8. Kobayashi T, Ganley AR. Recombination regulation by transcription-induced cohesin  
667 dissociation in rDNA repeats. *Science.* 2005;309(5740):1581-4. Epub 2005/09/06. doi:  
668 10.1126/science.1116102. PubMed PMID: 16141077.
- 669 9. Fritze CE, Verschueren K, Strich R, Easton Esposito R. Direct evidence for SIR2  
670 modulation of chromatin structure in yeast rDNA. *Embo j.* 1997;16(21):6495-509. Epub  
671 1997/11/14. doi: 10.1093/emboj/16.21.6495. PubMed PMID: 9351831; PubMed Central PMCID:  
672 PMCPMC1170255.
- 673 10. Sandmeier JJ, French S, Osheim Y, Cheung WL, Gallo CM, Beyer AL, et al. RPD3 is  
674 required for the inactivation of yeast ribosomal DNA genes in stationary phase. *Embo j.*  
675 2002;21(18):4959-68. Epub 2002/09/18. PubMed PMID: 12234935; PubMed Central PMCID:  
676 PMCPMC126294.
- 677 11. Santoro R, Li J, Grummt I. The nucleolar remodeling complex NoRC mediates  
678 heterochromatin formation and silencing of ribosomal gene transcription. *Nat Genet.*  
679 2002;32(3):393-6. Epub 2002/10/09. doi: 10.1038/ng1010. PubMed PMID: 12368916.
- 680 12. Li J, Langst G, Grummt I. NoRC-dependent nucleosome positioning silences rRNA  
681 genes. *Embo j.* 2006;25(24):5735-41. Epub 2006/12/02. doi: 10.1038/sj.emboj.7601454.  
682 PubMed PMID: 17139253; PubMed Central PMCID: PMCPMC1698900.
- 683 13. Zhang Y, Anderson SJ, French SL, Sikes ML, Viktorovskaya OV, Huband J, et al. The  
684 SWI/SNF chromatin remodeling complex influences transcription by RNA polymerase I in  
685 *Saccharomyces cerevisiae*. *PLoS One.* 2013;8(2):e56793. Epub 2013/02/26. doi:  
686 10.1371/journal.pone.0056793. PubMed PMID: 23437238; PubMed Central PMCID:  
687 PMCPMC3577654.

- 688 14. Jones HS, Kawauchi J, Braglia P, Alen CM, Kent NA, Proudfoot NJ. RNA polymerase I  
689 in yeast transcribes dynamic nucleosomal rDNA. *Nat Struct Mol Biol.* 2007;14(2):123-30. Epub  
690 2007/01/30. doi: 10.1038/nsmb1199. PubMed PMID: 17259992.
- 691 15. Fazio TG, Tsukiyama T. Chromatin remodeling in vivo: evidence for a nucleosome  
692 sliding mechanism. *Mol Cell.* 2003;12(5):1333-40. Epub 2003/11/26. PubMed PMID: 14636590.
- 693 16. Goldmark JP, Fazio TG, Estep PW, Church GM, Tsukiyama T. The Isw2 chromatin  
694 remodeling complex represses early meiotic genes upon recruitment by Ume6p. *Cell.*  
695 2000;103(3):423-33. Epub 2000/11/18. PubMed PMID: 11081629.
- 696 17. Fazio TG, Kooperberg C, Goldmark JP, Neal C, Basom R, Delrow J, et al. Widespread  
697 collaboration of Isw2 and Sin3-Rpd3 chromatin remodeling complexes in transcriptional  
698 repression. *Mol Cell Biol.* 2001;21(19):6450-60. Epub 2001/09/05. PubMed PMID: 11533234;  
699 PubMed Central PMCID: PMCPMC99792.
- 700 18. Whitehouse I, Rando OJ, Delrow J, Tsukiyama T. Chromatin remodelling at promoters  
701 suppresses antisense transcription. *Nature.* 2007;450(7172):1031-5. Epub 2007/12/14. doi:  
702 10.1038/nature06391. PubMed PMID: 18075583.
- 703 19. Tsukuda T, Fleming AB, Nickoloff JA, Osley MA. Chromatin remodelling at a DNA  
704 double-strand break site in *Saccharomyces cerevisiae*. *Nature.* 2005;438(7066):379-83. Epub  
705 2005/11/18. doi: 10.1038/nature04148. PubMed PMID: 16292314; PubMed Central PMCID:  
706 PMCPMC1388271.
- 707 20. Udugama M, Sabri A, Bartholomew B. The INO80 ATP-dependent chromatin remodeling  
708 complex is a nucleosome spacing factor. *Mol Cell Biol.* 2011;31(4):662-73. Epub 2010/12/08.  
709 doi: 10.1128/mcb.01035-10. PubMed PMID: 21135121; PubMed Central PMCID:  
710 PMCPMC3028646.
- 711 21. Papamichos-Chronakis M, Watanabe S, Rando OJ, Peterson CL. Global regulation of  
712 H2A.Z localization by the INO80 chromatin-remodeling enzyme is essential for genome

- 713 integrity. *Cell*. 2011;144(2):200-13. Epub 2011/01/19. doi: 10.1016/j.cell.2010.12.021. PubMed  
714 PMID: 21241891; PubMed Central PMCID: PMC3035940.
- 715 22. Zhou CY, Johnson SL, Lee LJ, Longhurst AD, Beckwith SL, Johnson MJ, et al. The  
716 Yeast INO80 Complex Operates as a Tunable DNA Length-Sensitive Switch to Regulate  
717 Nucleosome Sliding. *Mol Cell*. 2018;69(4):677-88.e9. Epub 2018/02/18. doi:  
718 10.1016/j.molcel.2018.01.028. PubMed PMID: 29452642.
- 719 23. Morrison AJ, Highland J, Krogan NJ, Arbel-Eden A, Greenblatt JF, Haber JE, et al.  
720 INO80 and gamma-H2AX interaction links ATP-dependent chromatin remodeling to DNA  
721 damage repair. *Cell*. 2004;119(6):767-75. Epub 2004/12/21. doi: 10.1016/j.cell.2004.11.037.  
722 PubMed PMID: 15607974.
- 723 24. Morrison AJ, Kim JA, Person MD, Highland J, Xiao J, Wehr TS, et al. Mec1/Tel1  
724 phosphorylation of the INO80 chromatin remodeling complex influences DNA damage  
725 checkpoint responses. *Cell*. 2007;130(3):499-511. Epub 2007/08/19. doi:  
726 10.1016/j.cell.2007.06.010. PubMed PMID: 17693258.
- 727 25. Shimada K, Oma Y, Schleker T, Kugou K, Ohta K, Harata M, et al. Ino80 chromatin  
728 remodeling complex promotes recovery of stalled replication forks. *Curr Biol*. 2008;18(8):566-  
729 75. Epub 2008/04/15. doi: 10.1016/j.cub.2008.03.049. PubMed PMID: 18406137.
- 730 26. Vincent JA, Kwong TJ, Tsukiyama T. ATP-dependent chromatin remodeling shapes the  
731 DNA replication landscape. *Nat Struct Mol Biol*. 2008;15(5):477-84. Epub 2008/04/15. doi:  
732 10.1038/nsmb.1419. PubMed PMID: 18408730; PubMed Central PMCID: PMC3035940.
- 733 27. Au TJ, Rodriguez J, Vincent JA, Tsukiyama T. ATP-dependent chromatin remodeling  
734 factors tune S phase checkpoint activity. *Mol Cell Biol*. 2011;31(22):4454-63. Epub 2011/09/21.  
735 doi: 10.1128/mcb.05931-11. PubMed PMID: 21930788; PubMed Central PMCID:  
736 PMC3209248.
- 737 28. Smith JS, Boeke JD. An unusual form of transcriptional silencing in yeast ribosomal  
738 DNA. *Genes Dev*. 1997;11(2):241-54. Epub 1997/01/15. PubMed PMID: 9009206.

- 739 29. Conconi A, Widmer RM, Koller T, Sogo JM. Two different chromatin structures coexist in  
740 ribosomal RNA genes throughout the cell cycle. *Cell*. 1989;57(5):753-61. Epub 1989/06/02.  
741 PubMed PMID: 2720786.
- 742 30. French SL, Osheim YN, Cioci F, Nomura M, Beyer AL. In exponentially growing  
743 *Saccharomyces cerevisiae* cells, rRNA synthesis is determined by the summed RNA  
744 polymerase I loading rate rather than by the number of active genes. *Mol Cell Biol*.  
745 2003;23(5):1558-68. Epub 2003/02/18. PubMed PMID: 12588976; PubMed Central PMCID:  
746 PMCPMC151703.
- 747 31. Merz K, Hondele M, Goetze H, Gmelch K, Stoeckl U, Griesenbeck J. Actively  
748 transcribed rRNA genes in *S. cerevisiae* are organized in a specialized chromatin associated  
749 with the high-mobility group protein Hmo1 and are largely devoid of histone molecules. *Genes*  
750 *Dev*. 2008;22(9):1190-204. Epub 2008/05/03. doi: 10.1101/gad.466908. PubMed PMID:  
751 18451108; PubMed Central PMCID: PMCPMC2335315.
- 752 32. Dammann R, Lucchini R, Koller T, Sogo JM. Chromatin structures and transcription of  
753 rDNA in yeast *Saccharomyces cerevisiae*. *Nucleic Acids Res*. 1993;21(10):2331-8. Epub  
754 1993/05/25. PubMed PMID: 8506130; PubMed Central PMCID: PMCPMC309528.
- 755 33. Woolford JL, Jr., Baserga SJ. Ribosome biogenesis in the yeast *Saccharomyces*  
756 *cerevisiae*. *Genetics*. 2013;195(3):643-81. Epub 2013/11/06. doi: 10.1534/genetics.113.153197.  
757 PubMed PMID: 24190922; PubMed Central PMCID: PMCPMC3813855.
- 758 34. Bywater MJ, Poortinga G, Sanij E, Hein N, Peck A, Cullinane C, et al. Inhibition of RNA  
759 polymerase I as a therapeutic strategy to promote cancer-specific activation of p53. *Cancer*  
760 *Cell*. 2012;22(1):51-65. Epub 2012/07/14. doi: 10.1016/j.ccr.2012.05.019. PubMed PMID:  
761 22789538; PubMed Central PMCID: PMCPMC3749732.
- 762 35. Laribee RN, Hosni-Ahmed A, Workman JJ, Chen H. Ccr4-not regulates RNA  
763 polymerase I transcription and couples nutrient signaling to the control of ribosomal RNA  
764 biogenesis. *PLoS Genet*. 2015;11(3):e1005113. Epub 2015/03/31. doi:

- 765 10.1371/journal.pgen.1005113. PubMed PMID: 25815716; PubMed Central PMCID:  
766 PMCPMC4376722.
- 767 36. Beckouet F, Labarre-Mariotte S, Albert B, Imazawa Y, Werner M, Gadal O, et al. Two  
768 RNA polymerase I subunits control the binding and release of Rrn3 during transcription. *Mol*  
769 *Cell Biol.* 2008;28(5):1596-605. Epub 2007/12/19. doi: 10.1128/mcb.01464-07. PubMed PMID:  
770 18086878; PubMed Central PMCID: PMCPMC2258765.
- 771 37. Weiner A, Hughes A, Yassour M, Rando OJ, Friedman N. High-resolution nucleosome  
772 mapping reveals transcription-dependent promoter packaging. *Genome Res.* 2010;20(1):90-  
773 100. Epub 2009/10/23. doi: 10.1101/gr.098509.109. PubMed PMID: 19846608; PubMed Central  
774 PMCID: PMCPMC2798834.
- 775 38. Azvolinsky A, Giresi PG, Lieb JD, Zakian VA. Highly transcribed RNA polymerase II  
776 genes are impediments to replication fork progression in *Saccharomyces cerevisiae*. *Mol Cell.*  
777 2009;34(6):722-34. Epub 2009/06/30. doi: 10.1016/j.molcel.2009.05.022. PubMed PMID:  
778 19560424; PubMed Central PMCID: PMCPMC2728070.
- 779 39. Sanij E, Poortinga G, Sharkey K, Hung S, Holloway TP, Quin J, et al. UBF levels  
780 determine the number of active ribosomal RNA genes in mammals. *J Cell Biol.*  
781 2008;183(7):1259-74. Epub 2008/12/24. doi: 10.1083/jcb.200805146. PubMed PMID:  
782 19103806; PubMed Central PMCID: PMCPMC2606969.
- 783 40. Jiang C, Pugh BF. Nucleosome positioning and gene regulation: advances through  
784 genomics. *Nat Rev Genet.* 2009;10(3):161-72. Epub 2009/02/11. doi: 10.1038/nrg2522.  
785 PubMed PMID: 19204718; PubMed Central PMCID: PMCPMC4860946.
- 786 41. Rando OJ, Winston F. Chromatin and transcription in yeast. *Genetics.* 2012;190(2):351-  
787 87. Epub 2012/02/22. doi: 10.1534/genetics.111.132266. PubMed PMID: 22345607; PubMed  
788 Central PMCID: PMCPMC3276623.

- 789 42. Simpson RT. Nucleosome positioning can affect the function of a cis-acting DNA  
790 element in vivo. *Nature*. 1990;343(6256):387-9. Epub 1990/01/25. doi: 10.1038/343387a0.  
791 PubMed PMID: 2405281.
- 792 43. Lipford JR, Bell SP. Nucleosomes positioned by ORC facilitate the initiation of DNA  
793 replication. *Mol Cell*. 2001;7(1):21-30. Epub 2001/02/15. PubMed PMID: 11172708.
- 794 44. Kurat CF, Yeeles JTP, Patel H, Early A, Diffley JFX. Chromatin Controls DNA  
795 Replication Origin Selection, Lagging-Strand Synthesis, and Replication Fork Rates. *Mol Cell*.  
796 2017;65(1):117-30. Epub 2016/12/19. doi: 10.1016/j.molcel.2016.11.016. PubMed PMID:  
797 27989438; PubMed Central PMCID: PMC5222724.
- 798 45. Euskirchen GM, Auerbach RK, Davidov E, Gianoulis TA, Zhong G, Rozowsky J, et al.  
799 Diverse roles and interactions of the SWI/SNF chromatin remodeling complex revealed using  
800 global approaches. *PLoS Genet*. 2011;7(3):e1002008. Epub 2011/03/17. doi:  
801 10.1371/journal.pgen.1002008. PubMed PMID: 21408204; PubMed Central PMCID:  
802 PMC3048368.
- 803 46. Flanagan JF, Peterson CL. A role for the yeast SWI/SNF complex in DNA replication.  
804 *Nucleic Acids Res*. 1999;27(9):2022-8. Epub 1999/04/13. PubMed PMID: 10198436; PubMed  
805 Central PMCID: PMC148416.
- 806 47. Azmi IF, Watanabe S, Maloney MF, Kang S, Belsky JA, MacAlpine DM, et al.  
807 Nucleosomes influence multiple steps during replication initiation. *Elife*. 2017;6. Epub  
808 2017/03/23. doi: 10.7554/eLife.22512. PubMed PMID: 28322723; PubMed Central PMCID:  
809 PMC5400510.
- 810 48. Muller M, Lucchini R, Sogo JM. Replication of yeast rDNA initiates downstream of  
811 transcriptionally active genes. *Mol Cell*. 2000;5(5):767-77. Epub 2000/07/06. PubMed PMID:  
812 10882113.
- 813 49. Salim D, Bradford WD, Freeland A, Cady G, Wang J, Pruitt SC, et al. DNA replication  
814 stress restricts ribosomal DNA copy number. *PLoS Genet*. 2017;13(9):e1007006. Epub



- 815 2017/09/16. doi: 10.1371/journal.pgen.1007006. PubMed PMID: 28915237; PubMed Central  
816 PMCID: PMCPMC5617229.
- 817 50. Kobayashi T, Heck DJ, Nomura M, Horiuchi T. Expansion and contraction of ribosomal  
818 DNA repeats in *Saccharomyces cerevisiae*: requirement of replication fork blocking (Fob1)  
819 protein and the role of RNA polymerase I. *Genes Dev.* 1998;12(24):3821-30. Epub 1998/12/31.  
820 PubMed PMID: 9869636; PubMed Central PMCID: PMCPMC317266.
- 821 51. Brewer BJ, Lockshon D, Fangman WL. The arrest of replication forks in the rDNA of  
822 yeast occurs independently of transcription. *Cell.* 1992;71(2):267-76. Epub 1992/10/16. PubMed  
823 PMID: 1423594.
- 824 52. Sanchez JC, Kwan EX, Pohl TJ, Amemiya HM, Raghuraman MK, Brewer BJ. Defective  
825 replication initiation results in locus specific chromosome breakage and a ribosomal RNA  
826 deficiency in yeast. *PLoS Genet.* 2017;13(10):e1007041. Epub 2017/10/17. doi:  
827 10.1371/journal.pgen.1007041. PubMed PMID: 29036220; PubMed Central PMCID:  
828 PMCPMC5658192.
- 829 53. Papamichos-Chronakis M, Krebs JE, Peterson CL. Interplay between Ino80 and Swr1  
830 chromatin remodeling enzymes regulates cell cycle checkpoint adaptation in response to DNA  
831 damage. *Genes Dev.* 2006;20(17):2437-49. Epub 2006/09/05. doi: 10.1101/gad.1440206.  
832 PubMed PMID: 16951256; PubMed Central PMCID: PMCPMC1560417.
- 833 54. Lademann CA, Renkawitz J, Pfander B, Jentsch S. The INO80 Complex Removes  
834 H2A.Z to Promote Presynaptic Filament Formation during Homologous Recombination. *Cell*  
835 *Rep.* 2017;19(7):1294-303. Epub 2017/05/18. doi: 10.1016/j.celrep.2017.04.051. PubMed  
836 PMID: 28514650.
- 837 55. Ganley AR, Ide S, Saka K, Kobayashi T. The effect of replication initiation on gene  
838 amplification in the rDNA and its relationship to aging. *Mol Cell.* 2009;35(5):683-93. Epub  
839 2009/09/15. doi: 10.1016/j.molcel.2009.07.012. PubMed PMID: 19748361.

- 840 56. Thomas BJ, Rothstein R. The genetic control of direct-repeat recombination in  
841 *Saccharomyces*: the effect of rad52 and rad1 on mitotic recombination at GAL10, a  
842 transcriptionally regulated gene. *Genetics*. 1989;123(4):725-38. Epub 1989/12/01. PubMed  
843 PMID: 2693208; PubMed Central PMCID: PMCPMC1203884.
- 844 57. Zhao X, Muller EG, Rothstein R. A suppressor of two essential checkpoint genes  
845 identifies a novel protein that negatively affects dNTP pools. *Mol Cell*. 1998;2(3):329-40. Epub  
846 1998/10/17. PubMed PMID: 9774971.
- 847 58. Rodriguez J, McKnight JN, Tsukiyama T. Genome-Wide Analysis of Nucleosome  
848 Positions, Occupancy, and Accessibility in Yeast: Nucleosome Mapping, High-Resolution  
849 Histone ChIP, and NCAM. *Curr Protoc Mol Biol*. 2014;108:21.8.1-16. Epub 2014/10/02. doi:  
850 10.1002/0471142727.mb2128s108. PubMed PMID: 25271716; PubMed Central PMCID:  
851 PMCPMC4183977.
- 852 59. Gelbart ME, Bachman N, Delrow J, Boeke JD, Tsukiyama T. Genome-wide identification  
853 of Isw2 chromatin-remodeling targets by localization of a catalytically inactive mutant. *Genes*  
854 *Dev*. 2005;19(8):942-54. Epub 2005/04/19. doi: 10.1101/gad.1298905. PubMed PMID:  
855 15833917; PubMed Central PMCID: PMCPMC1080133.
- 856 60. Kwan EX, Wang XS, Amemiya HM, Brewer BJ, Raghuraman MK. rDNA Copy Number  
857 Variants Are Frequent Passenger Mutations in *Saccharomyces cerevisiae* Deletion Collections  
858 and de Novo Transformants. *G3 (Bethesda)*. 2016;6(9):2829-38. Epub 2016/07/28. doi:  
859 10.1534/g3.116.030296. PubMed PMID: 27449518; PubMed Central PMCID:  
860 PMCPMC5015940.
- 861
- 862
- 863
- 864

## 865 **Supporting Information**

866

867 **S1 Fig. Striking nucleosome positioning changes at a canonical *Isw2* target.** (A) MNase-  
868 seq data at a well-established *Isw2* target, the 5' end of the *POT1* gene. (B) Visualization of the  
869 same data shown in S2A Fig with the ribbon plots used in Fig 3B, focusing on two pairs of  
870 nucleosomes.

871

872 **S2 Fig. Nucleosome positioning in single and double mutants throughout the rDNA.** (A)

873 MNase-seq data analyzed with dyad mapping showing the entire 35S rRNA gene. No clear  
874 differences in nucleosome positioning can be seen. (B) Ribbon plot of the same MNase-seq  
875 data focused on the 5S-adjacent nucleosome. In wild-type cells and *isw2* $\Delta$  and *nhp10* $\Delta$  cells,  
876 sub-species *a* is higher than sub-species *b*, while in *isw2* $\Delta$  *nhp10* $\Delta$  cells the *b* peak is higher  
877 than for *a*. (C) RNA Pol III ChIP-seq at the Pol III-transcribed 5S gene showing no appreciable  
878 difference in levels of the polymerase between wild-type and *isw2* $\Delta$  *nhp10* $\Delta$  cells. (D) MNase-  
879 seq ribbon plot at the 35S promoter region showing no appreciable difference in nucleosome  
880 positioning across the strains tested.

881

882 **S3 Fig. Different MNase digestions.** (D) Representative gel indicating how nucleosomal  
883 ladders appear after digestion with 20, 40, or 80 units of MNase. Note that for all MNase-seq  
884 analyses, regardless of level of digestion, the mono-nucleosomal band was gel-purified and was  
885 the sole source of material subjected to deep sequencing.

886

887 **S4 Fig. DNA polymerase pausing does not vary between tested strains at a known pause**  
888 **site, *PDC1*.** ChIP-seq of DNA polymerase epsilon subunit Pol2 at the *PDC1* gene, a site known

889 to show polymerase pausing by this method (Azvolinsky 2009). Levels of Pol2 do not  
890 appreciably vary across the strains tested.

891

892 **S5 Fig. *Isw2* and *Ino80* affect depth of the 35S promoter's nucleosome depleted region.**

893 The same H3 ChIP-seq data shown in Fig 2A, zoomed in on the 35S promoter region (Y axis on  
894 log<sub>2</sub> scale). Depth of the NDR is appreciably greater in *isw2Δ nhp10Δ* cells than in wild-type  
895 cells, and NDR depth is at an intermediate level in single mutant cells.

896

897 **S1 Table. List of yeast strains used.**

898

899 **S2 Table. List of PCR primers used.**

900

901 **S3 Table. List of plasmids used.**

902

903

904 **Figure Captions**

905

906 **Fig 1. The *Isw2* and *Ino80* chromatin remodeling complexes are targeted to the rDNA**

907 **locus.** (A) A schematic drawing of the rDNA locus in *S. cerevisiae*. In a typical yeast cell, the  
908 rDNA accounts for approximately 1.5 Mb of chromosome XII, comprised of a tandem array of  
909 ~150 copies of the rDNA repeat. Each repeat contains a 35S rRNA gene and an inter-genic  
910 spacer (IGS) region in between adjacent 35S genes, itself split into IGS1 and IGS2 regions by  
911 the 5S rRNA gene. IGS1 contains the ribosomal origin of replication, or autonomously  
912 replicating sequence (rARS), and IGS2 contains the bi-directional RNA Polymerase II promoter,  
913 E-pro, and a replication fork block (RFB). (B) The *Isw2* subunit of the *Isw2* complex and the

914 Nhp10 subunit of the Ino80 complex were each FLAG-tagged, chromatin immuno-precipitated,  
915 and deep-sequenced (ChIP-seq). (C) Representative ChIP-seq signals of Isw2 and Nhp10 at  
916 single copy targets outside of the rDNA.

917

918

919 **Fig 2. Nucleosome occupancy, but not transcription, is affected at the 35S rDNA in *isw2* $\Delta$**   
920 **and *nhp10* $\Delta$  mutants.**

921 (A) Histone H3 ChIP-seq through the 35S rRNA gene. Line represents average log<sub>2</sub> ChIP-seq  
922 signal at each base pair for two independent experiments, and the ribbon represents the  
923 standard error of the mean at each base pair. Schematic drawing of the 35S includes  
924 transcribed spacers that are removed during processing, as well as the mature 18S, 5.8S, and  
925 25S rRNAs that are parts of complete ribosomes. ETS1 and ITS1 qPCR primer sets are  
926 indicated with red lines, and ETS1 hybridization probe, used in the Southern blot shown in 2B,  
927 indicated in green. In this and all following figures, “wild-type” has been abbreviated as “WT”.

928 (B) Psoralen cross-linked DNA, digested with EcoRI and hybridized with a probe to the ETS1  
929 region. Psoralen incorporates more readily into nucleosome-occupied, actively transcribed  
930 rDNA repeats, causing these bands to migrate more slowly than nucleosome-depleted, inactive  
931 repeats. Two independent isolates of each remodeling factor mutant are shown. For  
932 quantification, mean intensity of each band was measured with ImageJ software. Values for  
933 each genotype reflect between 3 and 5 biological replicates, and error bars represent standard  
934 error of the mean. (C) RT-qPCR measuring the ETS1 and ITS1 of the 35S pre-rRNA. (D) RNA  
935 Pol I ChIP-seq.

936

937 **Fig 3. *Isw2* and *Ino80* affect nucleosome positioning in the rDNA inter-genic spacer.**

938 (A) Micrococcal nuclease digestion followed by deep-sequencing (MNase-seq) profiles in the  
939 IGS, with *Isw2* ChIP-seq data overlaid. From each paired end sequencing read, the nucleosome

940 dyad was inferred and plotted. (B) Ribbon plots, generated as described in Fig 2A, focused on  
941 two pairs of nucleosomes, indicated with boxes in Fig 3A. Each of the four tested strains has a  
942 characteristic profile of positioning at each of these four nucleosomes. Different sub-species of  
943 nucleosome positions are indicated with colored arrows and letters. (C) MNase-seq comparing  
944 wild-type and *isw2Δ nhp10Δ* cells across three different strengths of MNase digestion. (D)  
945 Cartoon depicting different nucleosomal sub-species, highlighting the most striking differences  
946 in sub-species profiles between wild-type and *isw2Δ nhp10Δ* cells.

947

948 **Fig 4. *Isw2* and *Ino80* facilitate efficient firing of rDNA origin of replication.**

949 (A) Schematic drawing of 2D gel with features annotated. The 1N spot is comprised of  
950 restriction fragments that are not in the process of replicating; the Y arc of restriction fragments  
951 that are being passively replicated; and the bubble arc of restriction fragments in which an origin  
952 of replication has actively fired. Replication fork pausing at the RFB causes an accumulation of  
953 restriction fragments with a specific size and shape, visible as a dark spot on the left arm of the  
954 Y-arc. The ratio of bubble arc to Y arc signal is indicative of the ratio of actively to passively  
955 replicated restriction fragments, and thus of origin efficiency. (B) Representative 2D gels over  
956 rDNA ARS and RFB. Exposures of the blots have been adjusted so that the Y arc is of  
957 comparable intensity for each blot, such that direct comparison of bubble arc intensity across  
958 images is equivalent to a comparison of bubble-to-Y ratio. Bubble arc indicated by empty arrow,  
959 Y arc indicated by filled arrow. Quantification based on measurement of average intensity of  
960 arcs using ImageQuantTL software, and reflects at least two independent experiments for each  
961 genotype. All values normalized to the bubble:Y ratio for wild-type. Error bars show standard  
962 error of the mean. (C) Representative lightly exposed 2D gel images to allow visualization of the  
963 1N and RFB spots.

964

965 **Fig 5. *Isw2* and *Ino80* affect replication fork pausing and *Fob1* occupancy at the RFB.**

966 (A) ChIP-seq of DNA Polymerase Epsilon subunit Pol2 at the RFB. Ribbon plot produced as  
967 described in Fig 2A based on two biological replicates per genotype. Quantification produced by  
968 integrating the ChIP-seq signal for each strain across the RFB, and then averaging the results  
969 across two replicates. Error bars represent the standard error of the mean. (B) ChIP-qPCR of  
970 Fob1 with primers flanking the RFB and within ETS1, all normalized to occupancy at the RFB in  
971 wild-type cells. Fob1 is not expected to bind to ETS1, and thus it serves as a negative control  
972 locus. Error bars represent standard error of the mean for at least three replicates per genotype.  
973

974 **Fig 6. *Isw2* and *Ino80* affect the rate of rDNA copy number change.**

975 (A) rDNA copy number change assay. Blue bars indicate *fob1* copy number control strains that  
976 stably contain the indicated number of rDNA repeats (identical 150-copy control samples run on  
977 both ends of the gel to facilitate comparison of band migration). The gray bar denotes samples  
978 grown in a time course for the indicated number of generations, in selective medium to ensure  
979 retention of either a plasmid containing *FOB1* (green bar) or the plasmid backbone pRS426  
980 without *FOB1* (red bar). (B) Quantification of the copy number change assay. Average copy  
981 numbers at each time point were calculated based on migration of bands relative to controls.

# Fig 1

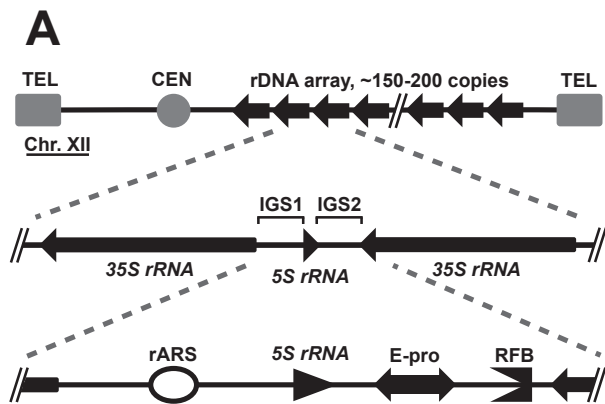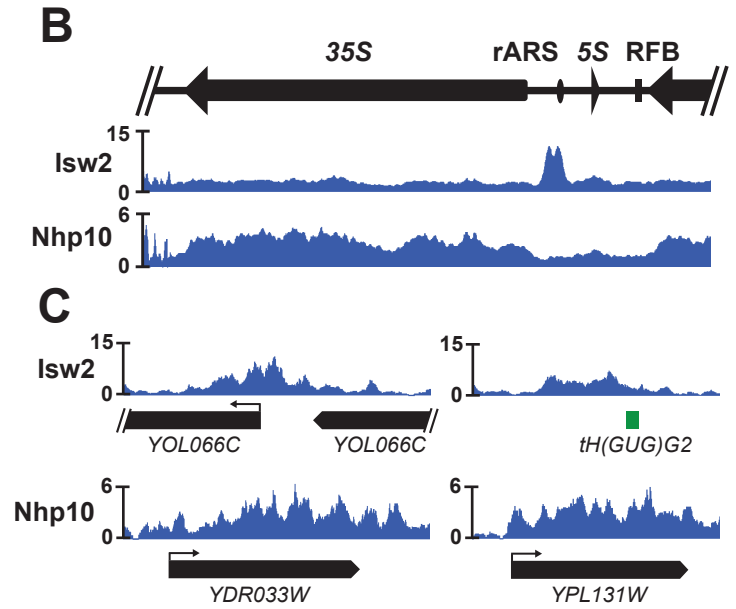



## Fig 2

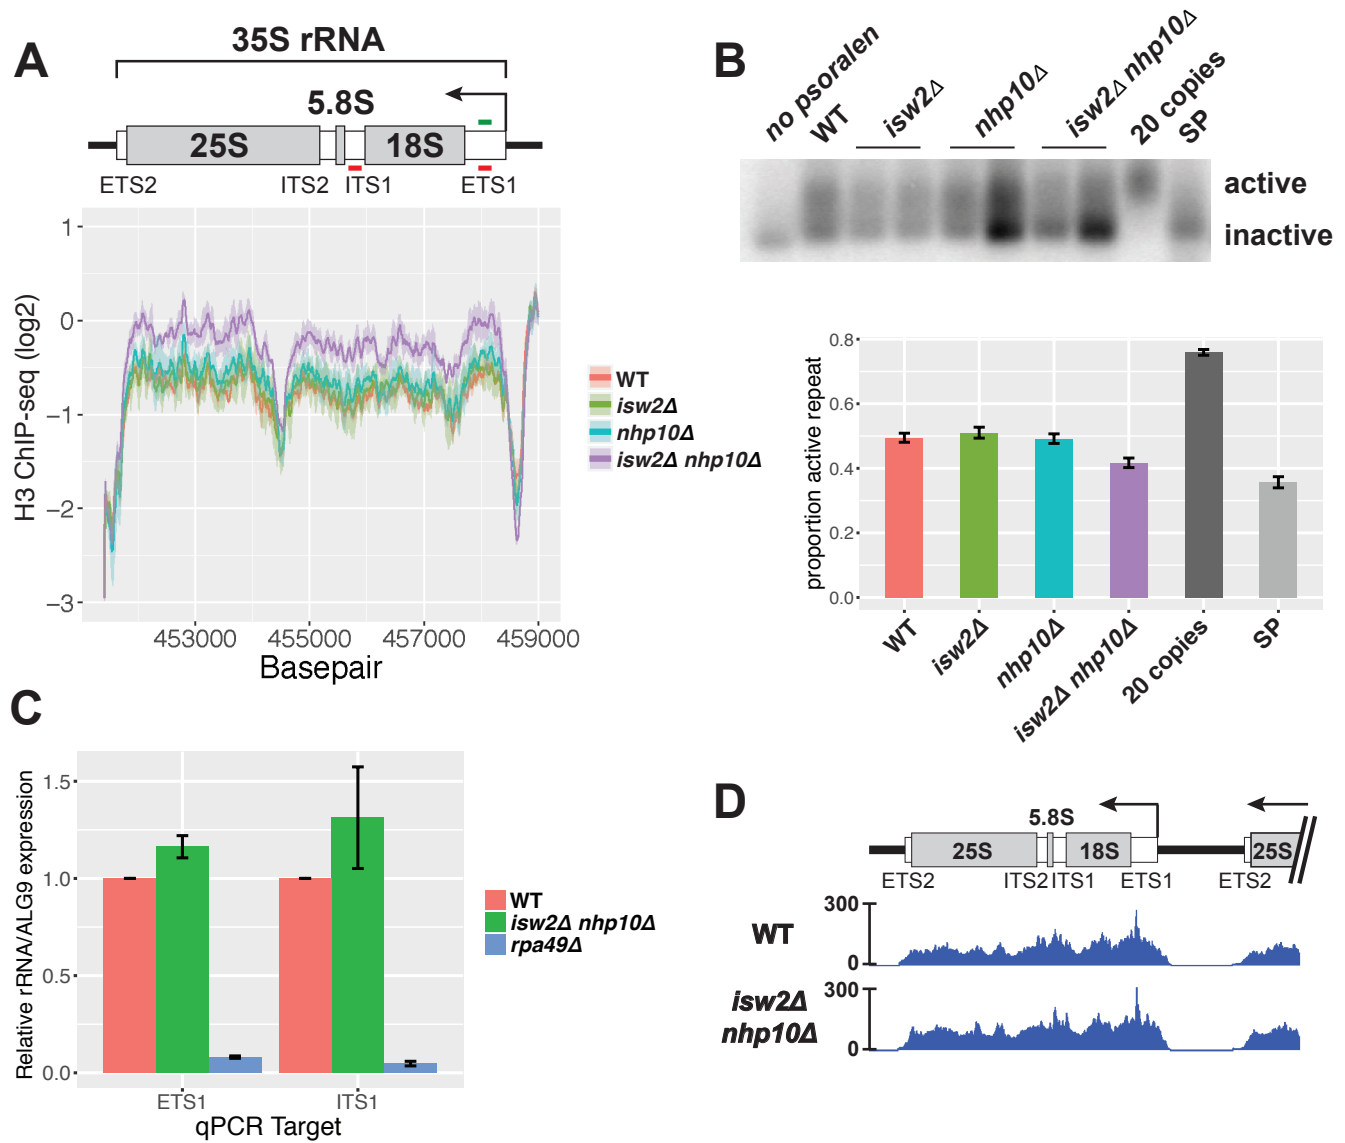

## Fig 3

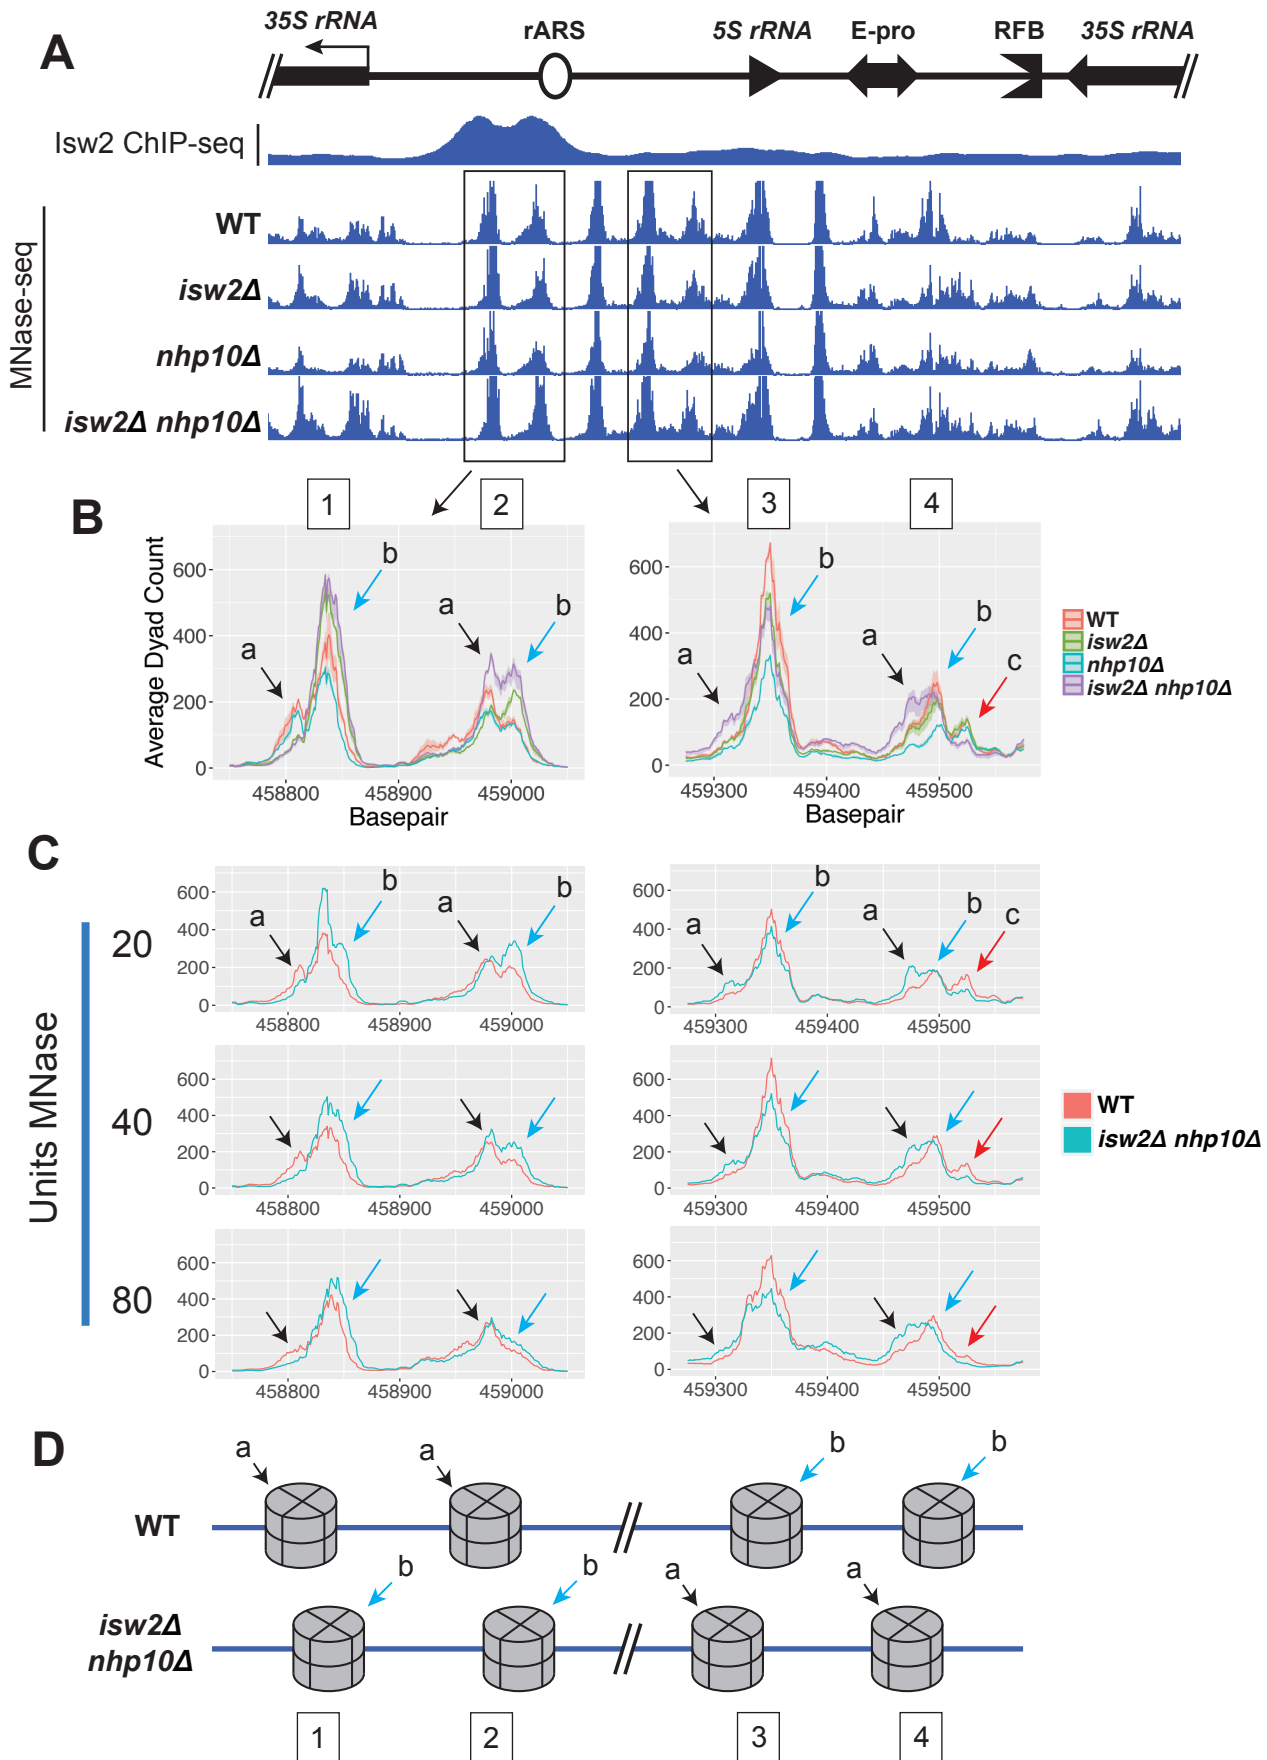

## Fig 4

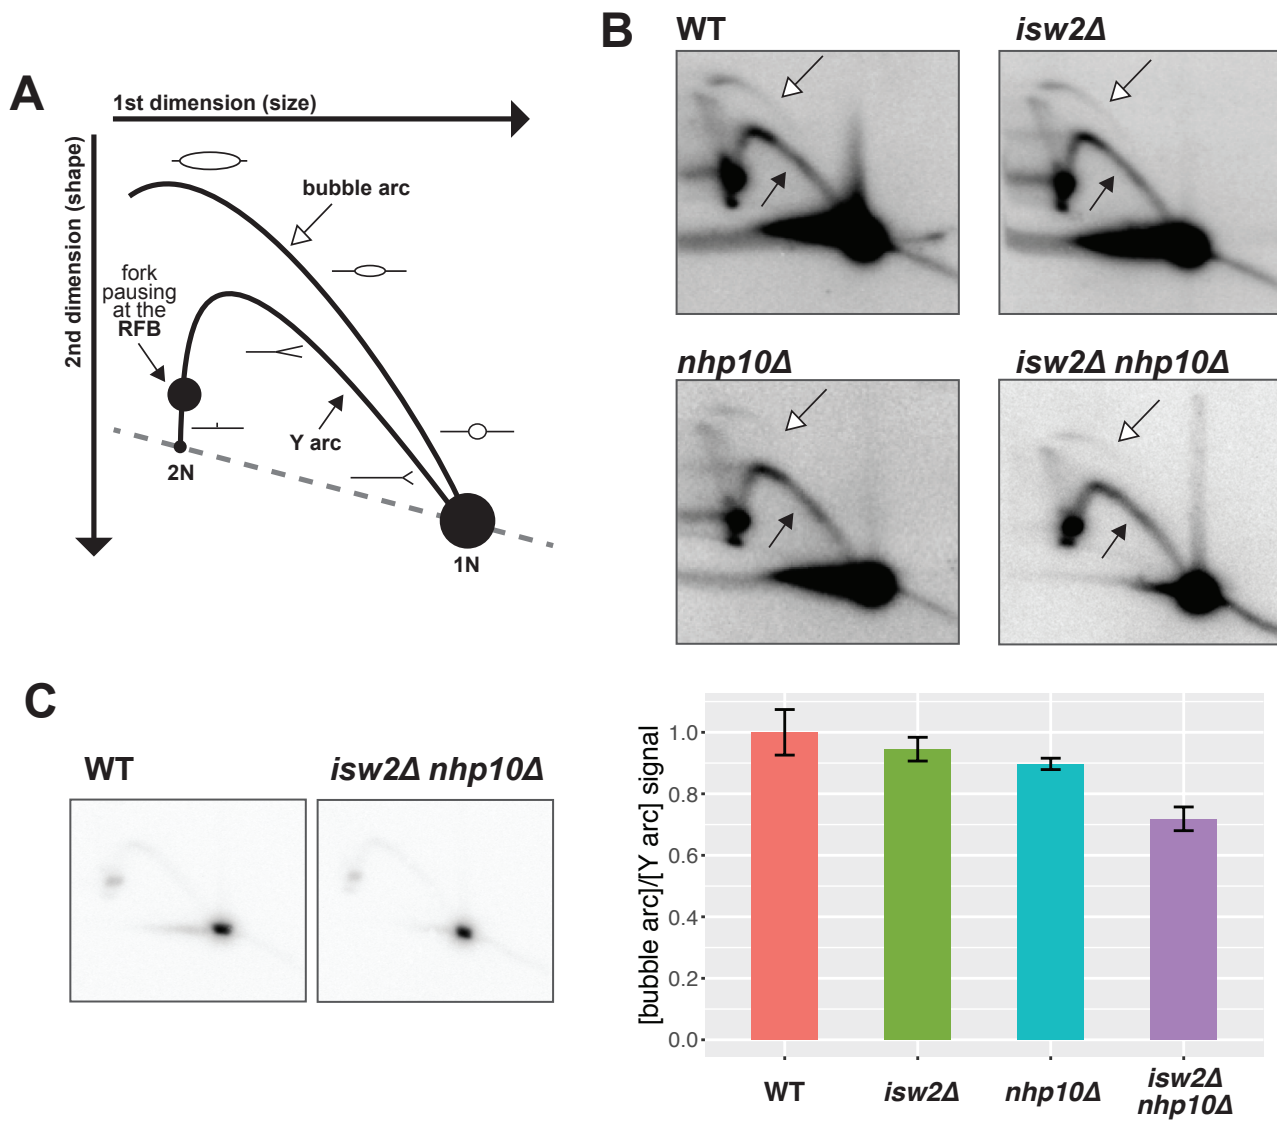

## Fig 5

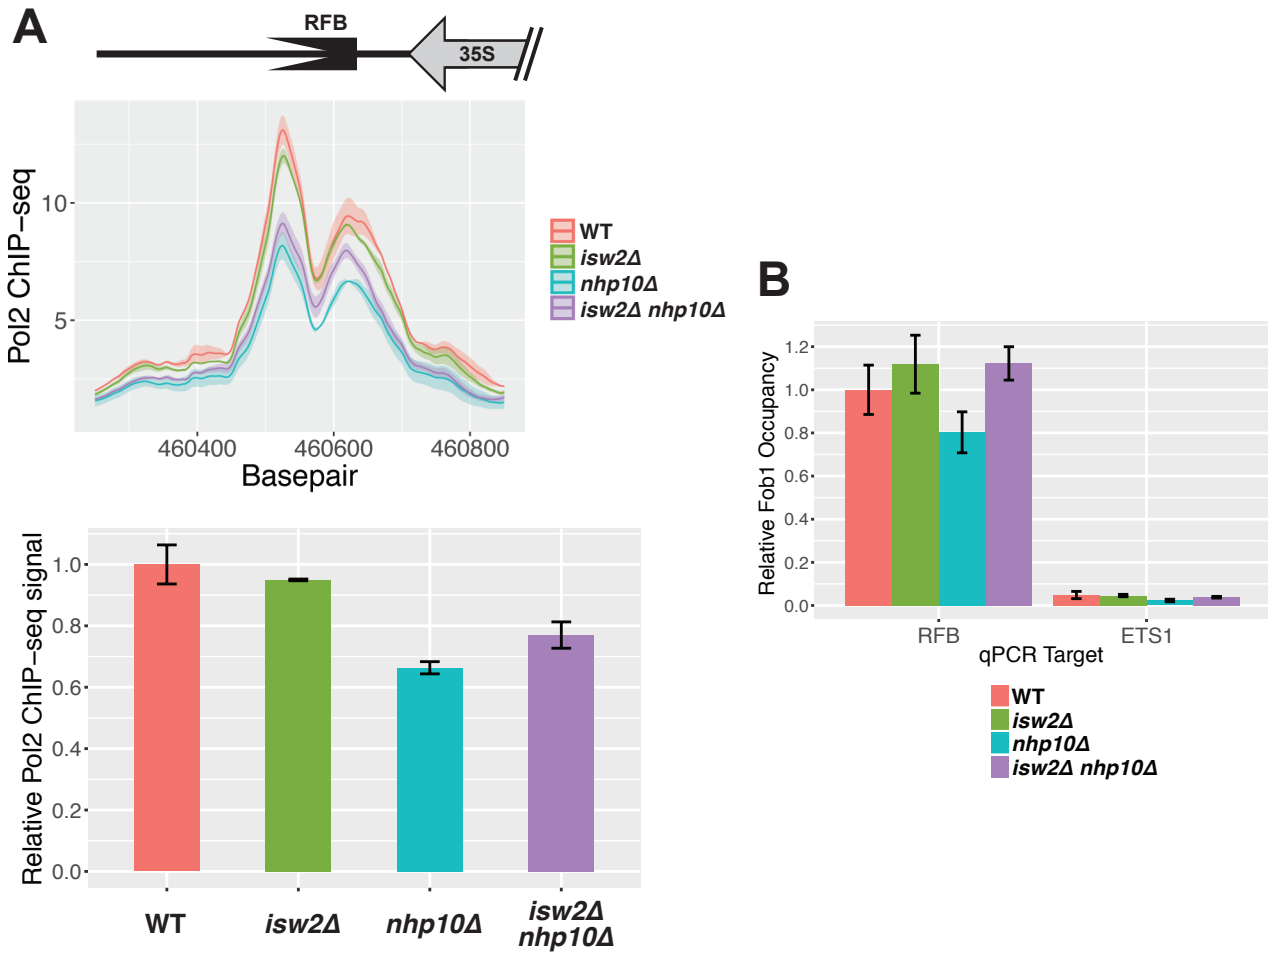

## Fig 6

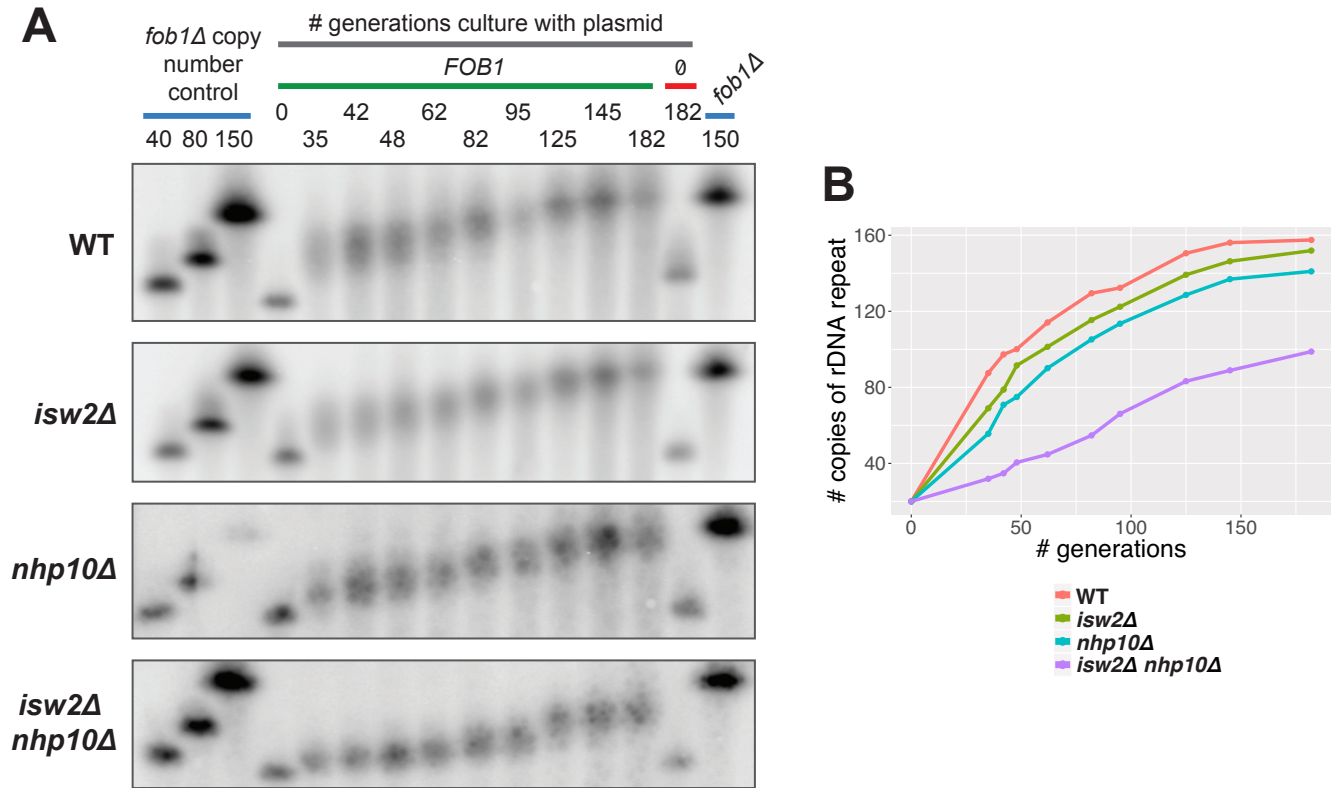

# Supplemental 1

**A**

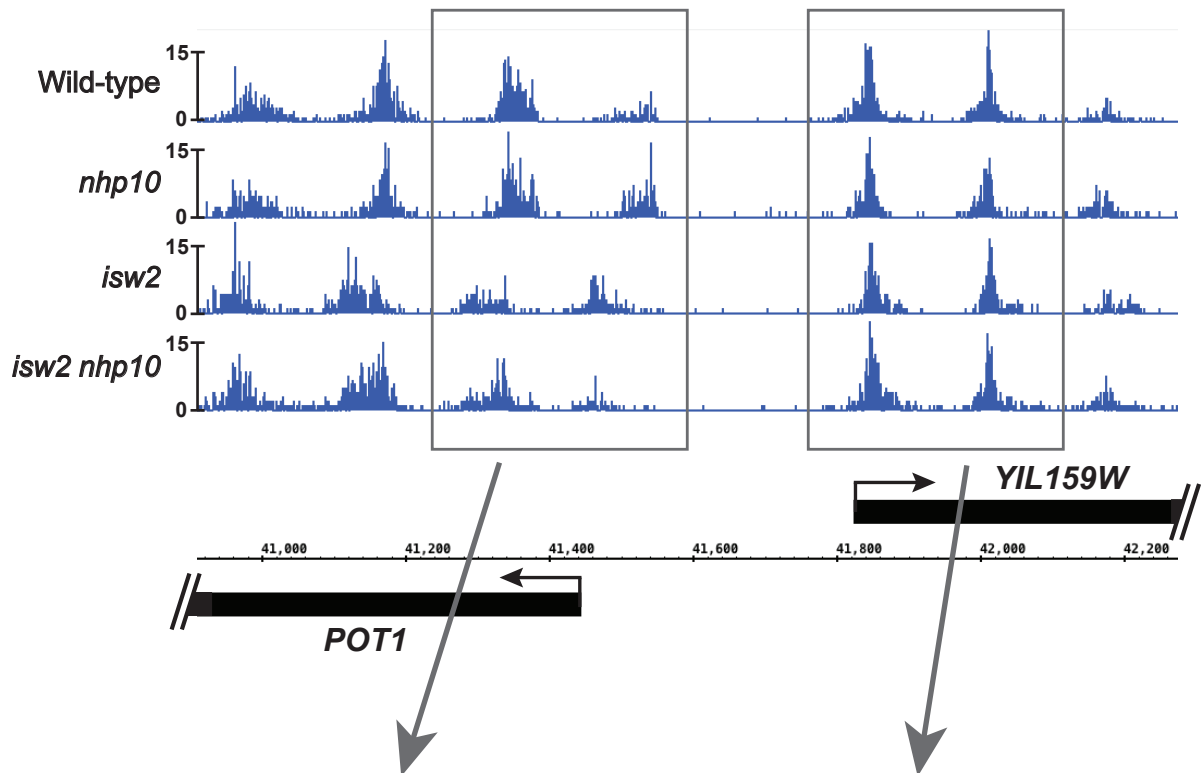

**B**

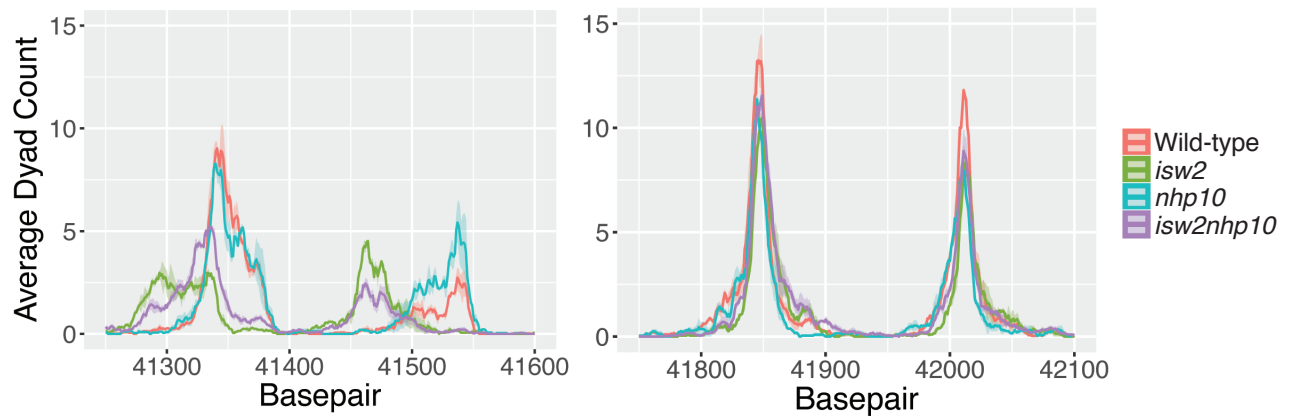

## Supplemental 2

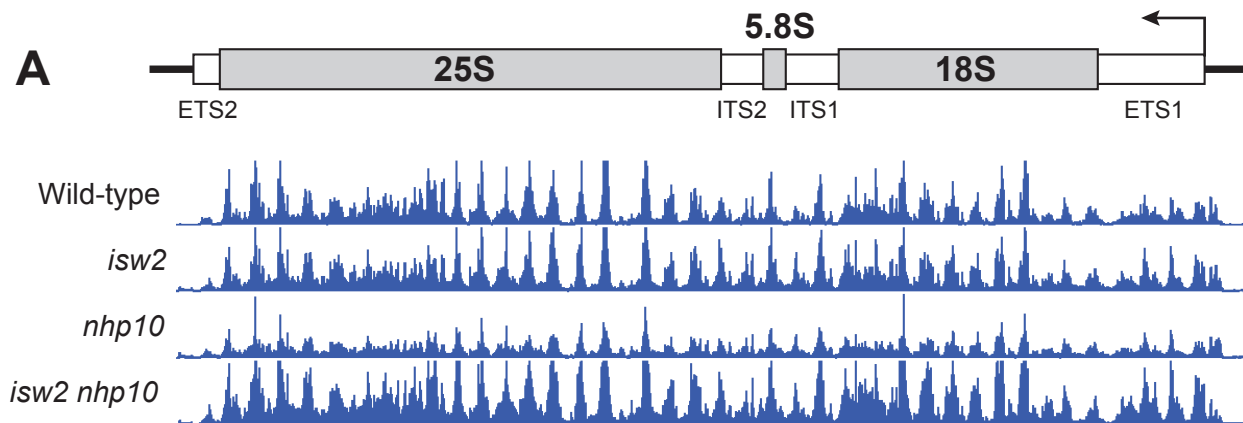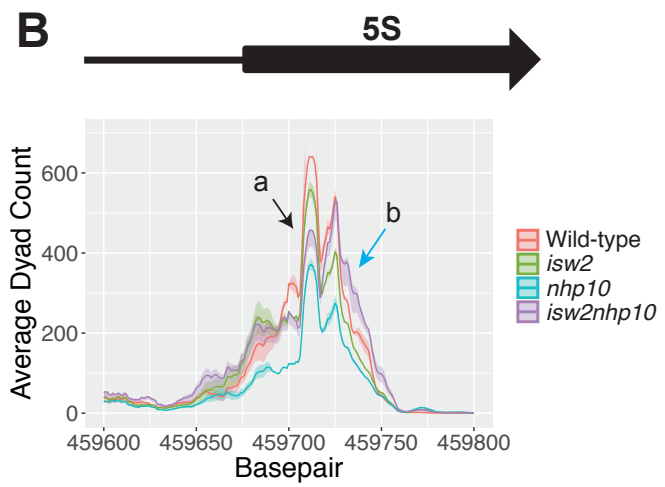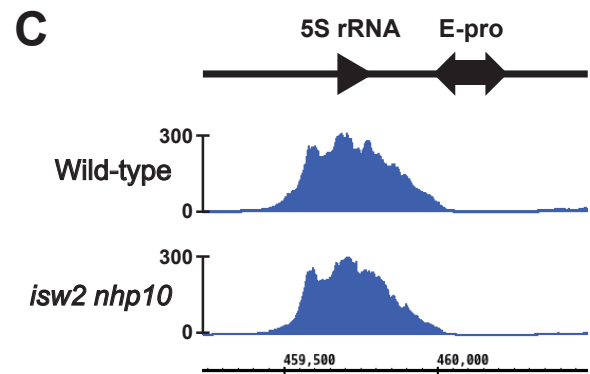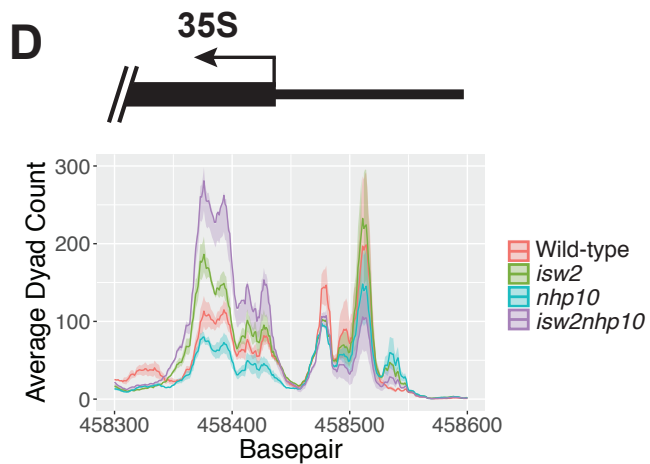

## Supplemental 3

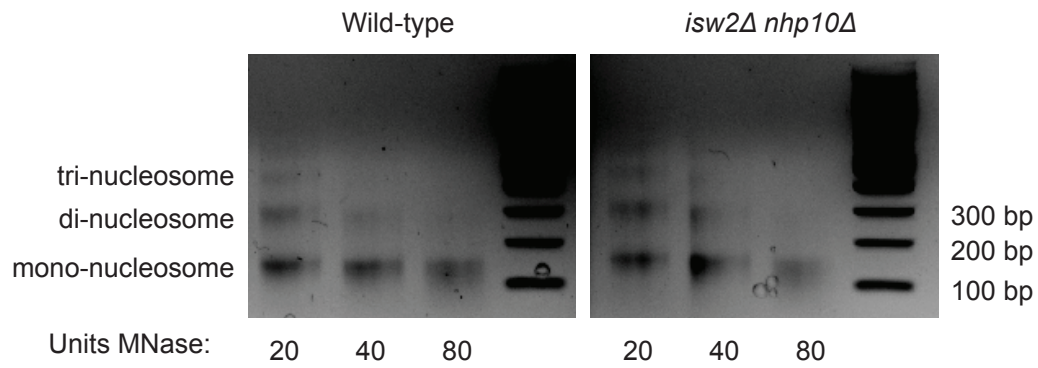



## Supplemental 4

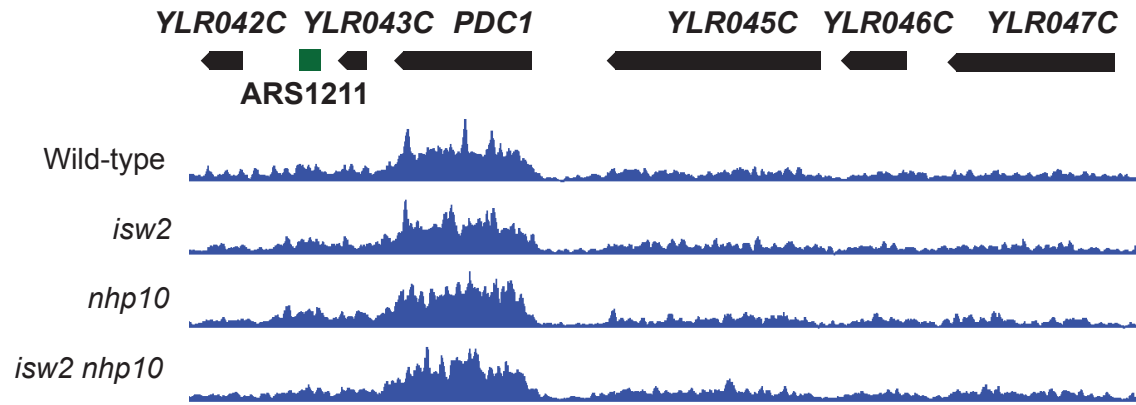

## Supplemental 5

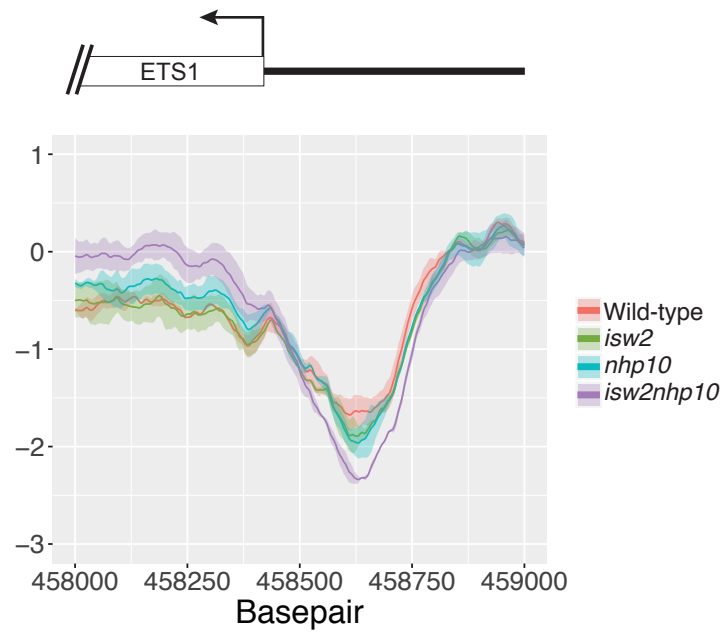

**S1 Table. Yeast strains used in this study.**

| Strain   | Genotype                                                                   | Reference                                         |
|----------|----------------------------------------------------------------------------|---------------------------------------------------|
| W1588-4C | <i>MATa ade2-1 can1-100 his3-11,15 leu2-3,112 trp1-1 ura3-1</i>            | Thomas and Rothstein 1989, Zhao <i>et al</i> 1998 |
| YTT3320  | W1588-4C; <i>isw2Δ::NatMX</i>                                              | Au <i>et al</i> 2011                              |
| YTT6809  | W1588-4C; <i>isw2Δ::NatMX</i>                                              | this study                                        |
| YTT3333  | W1588-4C; <i>nhp10Δ::Hyg</i>                                               | Au <i>et al</i> 2011                              |
| YTT2060  | W1588-4C; <i>nhp10Δ::Hyg</i>                                               | Vincent <i>et al</i> 2008                         |
| YTT3337  | W1588-4C; <i>isw2Δ::NatMX nhp10Δ::HYG</i>                                  | Au <i>et al</i> 2011                              |
| YTT2109  | W1588-4C; <i>isw2Δ::NatMX nhp10Δ::HYG</i>                                  | Vincent <i>et al</i> 2008                         |
| YTT1996  | W1588-4C; <i>ISW2-K215R-3FLAG-KanMX</i>                                    | Gelbart <i>et al</i> 2005                         |
| YTT1997  | W1588-4C; <i>ISW2-K215R-3FLAG-KanMX</i>                                    | Gelbart <i>et al</i> 2005                         |
| YTT3426  | W1588-4C; <i>NHP10-3FLAG-KanMX</i>                                         | Vincent <i>et al</i> 2008                         |
| YTT3427  | W1588-4C; <i>NHP10-3FLAG-KanMX</i>                                         | Vincent <i>et al</i> 2008                         |
| YTT6639  | W1588-4C; <i>rpa49Δ::KanMX</i>                                             | this study                                        |
| YTT6673  | W1588-4C; <i>isw2Δ::NatMX nhp10Δ::Hyg RPA190-2L-3FLAG::KanMX</i>           | this study                                        |
| YTT6679  | W1588-4C; <i>RPA190-2L-3FLAG::KanMX</i>                                    | this study                                        |
| YTT6686  | W1588-4C; <i>RPO31-2L-3FLAG::KanMX</i>                                     | this study                                        |
| YTT6693  | W1588-4C; <i>isw2Δ::NatMX nhp10Δ::Hyg RPO31-2L-3FLAG::KanMX</i>            | this study                                        |
| YTT6915  | W1588-4C; <i>Pol2-2L-3FLAG::KanMX</i>                                      | this study                                        |
| YTT6916  | W1588-4C; <i>Pol2-2L-3FLAG::KanMX</i>                                      | this study                                        |
| YTT6917  | W1588-4C; <i>isw2Δ::NatMX Pol2-2L-3FLAG::KanMX</i>                         | this study                                        |
| YTT6918  | W1588-4C; <i>isw2Δ::NatMX Pol2-2L-3FLAG::KanMX</i>                         | this study                                        |
| YTT6919  | W1588-4C; <i>nhp10Δ::Hyg Pol2-2L-3FLAG::KanMX</i>                          | this study                                        |
| YTT6920  | W1588-4C; <i>nhp10Δ::Hyg Pol2-2L-3FLAG::KanMX</i>                          | this study                                        |
| YTT6921  | W1588-4C; <i>isw2Δ::NatMX nhp10Δ::Hyg Pol2-2L-3FLAG::KanMX</i>             | this study                                        |
| YTT6922  | W1588-4C; <i>isw2Δ::NatMX nhp10Δ::Hyg Pol2-2L-3FLAG::KanMX</i>             | this study                                        |
| YTT7009  | W1588-4C; <i>Fob1-2L-3FLAG::KanMX</i>                                      | this study                                        |
| YTT7010  | W1588-4C; <i>Fob1-2L-3FLAG::KanMX</i>                                      | this study                                        |
| YTT7011  | W1588-4C; <i>isw2Δ::NatMX Fob1-2L-3FLAG::KanMX</i>                         | this study                                        |
| YTT7012  | W1588-4C; <i>isw2Δ::NatMX Fob1-2L-3FLAG::KanMX</i>                         | this study                                        |
| YTT7013  | W1588-4C; <i>nhp10Δ::Hyg Fob1-2L-3FLAG::KanMX</i>                          | this study                                        |
| YTT7014  | W1588-4C; <i>nhp10Δ::Hyg Fob1-2L-3FLAG::KanMX</i>                          | this study                                        |
| YTT7015  | W1588-4C; <i>isw2Δ::NatMX nhp10Δ::Hyg Fob1-2L-3FLAG::KanMX</i>             | this study                                        |
| YTT7016  | W1588-4C; <i>isw2Δ::NatMX nhp10Δ::Hyg Fob1-2L-3FLAG::KanMX</i>             | this study                                        |
| YSI101   | <i>MATa ade2-1 can1-100 his3-11,15 leu2-3,112 trp1-1 ura3-1 fob1::LEU2</i> | Ide <i>et al</i> 2010                             |
| YSI102   | YSI101; 20 copies rDNA                                                     | Ide <i>et al</i> 2010                             |
| YSI103   | YSI101; 40 copies rDNA                                                     | Ide <i>et al</i> 2010                             |
| YSI104   | YSI101; 80 copies rDNA                                                     | Ide <i>et al</i> 2010                             |
| YTT6294  | YSI102; <i>isw2Δ::NatMX</i>                                                | this study                                        |
| YTT6865  | YSI102; <i>nhp10Δ::HYG</i>                                                 | this study                                        |
| YTT6311  | YSI102; <i>isw2Δ::NatMX nhp10Δ::Hyg</i>                                    | this study                                        |
| YTT6312  | YSI102; <i>isw2Δ::NatMX nhp10Δ::Hyg</i>                                    | this study                                        |

**S2 Table. Primers used in this study.**

| Name        | Comment                            | Sequence                                                         |
|-------------|------------------------------------|------------------------------------------------------------------|
| ETS1-1      | 5' ETS1 qPCR                       | TGGGTTGATGCGTATTGAGA                                             |
| ETS1-2      | 3' ETS1 qPCR                       | TCGCTGATTTGAGAGGAGGT                                             |
| ALG9-1      | 5' ALG9 qPCR                       | CACGGATAGTGGCTTTGGTGAACAATTAC [1]                                |
| ALG9-2      | 3' ALG9 qPCR                       | TATGATTATCTGGCAGCAGGAAAGAAGCTTGGG [1]                            |
| ITS1-6      | 5' ITS1 qPCR                       | TGTTTTGGCAAGAGCATGAG                                             |
| ITS1-7      | 3' ITS1 qPCR                       | TCGAATGCCCAAAGAAAAAG                                             |
| RFB-1       | 5' RFB qPCR,<br>probe              | gcgggggtctagaCCACTGTTCACTGTTCACTGTTCA                            |
| RFB-2       | 3' RFB qPCR,<br>probe              | cccggcgctagcAGAGAAGGGCTTTCACAAAGCT                               |
| rDNA_ETS1-1 | 5' ETS1 probe                      | CCATTCCGTGAAACACC                                                |
| rDNA_ETS1-2 | 3' ETS1 probe                      | AAGAAAGAAACCGAAATCTC                                             |
| AG_Fob1_1   | 5' Fob1 Gibson<br>cloning (insert) | ctcactatagggcgaattgggtaccgggccTTAATAATGTACTTT<br>GCAGATGTTTGTTC  |
| AG_Fob1_3   | 3' Fob1 Gibson<br>cloning (insert) | cgcggtggcgccgctctagaactagtgggaCTAATGATAATGGC<br>TTTCTATTTGTTTTGC |
| AG_Fob1_2   | 5' Fob1 Gibson<br>cloning (vector) | GGAACAAACATCTGCAAAGTACATTATTAaggcccggt<br>accaattcgccctatagtgag  |
| AG_Fob1_4   | 3' Fob1 Gibson<br>cloning (vector) | GCAAACAATAGAAAGCCATTATCATTAGtcactagtt<br>ctagagcggccgccaccgcg    |

1. Teste MA, Duquenne M, Francois JM, Parrou JL. Validation of reference genes for quantitative expression analysis by real-time RT-PCR in *Saccharomyces cerevisiae*. BMC Mol Biol. 2009;10:99. Epub 2009/10/31. doi: 10.1186/1471-2199-10-99. PubMed PMID: 19874630; PubMed Central PMCID: PMCPMC2776018.

**S3 Table. Plasmids used in this study.**

| Name        | Description                                        |
|-------------|----------------------------------------------------|
| pRS426      | URA3, 2 $\mu$                                      |
| pRS426-Fob1 | pRS426 with <i>FOB1</i> promoter and coding region |
